1 **A PKA Inhibitor Motif within Smoothed Controls Hedgehog Signal Transduction**

2  
3 John T. Happ<sup>1,8</sup>, Corvin D. Arveseth<sup>1,8</sup>, Jessica Bruystens<sup>2,8</sup>, Daniela Bertinetti<sup>3,8</sup>, Isaac B.  
4 Nelson<sup>1,8</sup>, Cristina Olivieri<sup>4</sup>, Danielle S. Hedeem<sup>1</sup>, Ju-Fen Zhu<sup>1</sup>, Jacob L. Capener<sup>1</sup>, Jan Wilfried  
5 Bröckel<sup>3</sup>, Lily Vu<sup>5</sup>, C.C. King<sup>2,7</sup>, Victor L. Ruiz-Perez<sup>6</sup>, Gianluigi Veglia<sup>4</sup>, Friedrich W. Herberg<sup>3</sup>,  
6 Susan S. Taylor<sup>2,7,\*</sup>, Benjamin R. Myers<sup>1,\*</sup>

7  
8  
9  
10 <sup>1</sup>Department of Oncological Sciences, Department of Biochemistry, and Department of  
11 Bioengineering, University of Utah School of Medicine, Salt Lake City, UT, USA

12  
13 <sup>2</sup>Department of Pharmacology, University of California, San Diego, La Jolla, CA, USA

14  
15 <sup>3</sup>Institute for Biology, Department of Biochemistry, University of Kassel, Kassel, Germany

16  
17 <sup>4</sup>Department of Biochemistry, Molecular Biology, and Biophysics, University of Minnesota,  
18 Minneapolis, MN, USA

19  
20 <sup>5</sup>Department of Neurobiology, University of California, San Diego, La Jolla, CA, USA

21  
22 <sup>6</sup>Instituto de Investigaciones Biomédicas “Alberto Sols,” Consejo Superior de Investigaciones  
23 Científicas (CSIC)—Universidad Autónoma de Madrid (UAM), and CIBER de Enfermedades  
24 Raras (CIBERER), Instituto de Salud Carlos III (ISCIII), Madrid, Spain

25  
26 <sup>7</sup>Department of Chemistry and Biochemistry, University of California, San Diego, La Jolla, CA,  
27 USA

28  
29 <sup>8</sup>These authors contributed equally to this work

30  
31  
32 \*Correspondence: [staylor@ucsd.edu](mailto:staylor@ucsd.edu) or [benjamin.myers@hci.utah.edu](mailto:benjamin.myers@hci.utah.edu)

33  
34

35 **ABSTRACT**

36

37 The Hedgehog (Hh) cascade is central to development, tissue homeostasis, and cancer. A pivotal  
38 step in Hh signal transduction is the activation of GLI transcription factors by the atypical G  
39 protein-coupled receptor (GPCR) Smoothened (SMO). How SMO activates GLI has remained  
40 unclear for decades. Here we show that SMO employs a decoy substrate sequence to physically  
41 block the active site of the PKA catalytic subunit (PKA-C) and extinguish its enzymatic activity. As  
42 a result, GLI is released from phosphorylation-induced inhibition. Using a combination of *in vitro*,  
43 cellular, and organismal models, we demonstrate that interfering with SMO / PKA  
44 pseudosubstrate interactions prevents Hh signal transduction. The mechanism we uncovered  
45 echoes one utilized by the Wnt cascade, revealing an unexpected similarity in how these two  
46 essential developmental and cancer pathways signal intracellularly. More broadly, our findings  
47 define a new mode of GPCR-PKA communication that may be harnessed by a range of  
48 membrane receptors and kinases.

49

50

51

## 52 INTRODUCTION

53

54 The Hh signaling cascade is fundamental to embryogenesis, controlling the development of nearly  
55 every vertebrate organ<sup>1-4</sup>. Insufficient Hh pathway activity underlies birth defects affecting the  
56 nervous, cardiovascular, and musculoskeletal systems<sup>5-7</sup>. On the other hand, Hh pathway  
57 overactivation drives several common cancers, including basal cell carcinoma of the skin (the  
58 most common cancer in North America) and medulloblastoma (the most common pediatric brain  
59 tumor)<sup>8,9</sup>. The Hh pathway utilizes an unusual signal transduction mechanism involving layers of  
60 repressive interactions<sup>1-4</sup>. In the pathway “off” state, PKA-C phosphorylates GLI, stimulating its  
61 proteolysis into a truncated transcriptional repressor that inhibits target gene expression<sup>4,10</sup>. In the  
62 pathway “on” state, Hh ligands bind to and inactivate the 12-transmembrane sterol transporter  
63 PATCHED1 (PTCH1), which releases SMO from PTCH1-mediated inhibition<sup>4</sup>. This process  
64 allows SMO to access its endogenous sterol ligands and undergo an activating conformational  
65 change<sup>11-14</sup>. Once activated, SMO blocks PKA-C-mediated phosphorylation of GLI<sup>15-18</sup>, a key step  
66 that likely occurs within the tiny cell-surface compartment formed by the primary cilium<sup>19-21</sup>.  
67 Consequently, GLI is activated and can control the expression of proliferative or differentiative  
68 genes<sup>10</sup>. SMO regulation of PKA-C is thus a critical event in transducing Hh signals from the cell  
69 surface to the nucleus. However, the underlying mechanism has remained mysterious for  
70 decades<sup>1-4</sup>.

71

72 GPCRs classically inhibit PKA-C via well-characterized signaling cascades involving  
73 heterotrimeric G protein-mediated effects on cAMP which promote formation of inactive PKA  
74 holoenzymes<sup>22,23</sup>. In contrast, we recently found that SMO prevents PKA-C from phosphorylating  
75 substrates via a noncanonical mechanism. SMO directly interacts with PKA-C subunits, recruiting  
76 them to the membrane and thereby restricting their access to soluble GLI proteins. SMO / PKA-  
77 C interactions are triggered by GPCR kinases 2 and 3 (GRK2/3), which recognize the SMO active  
78 state and phosphorylate the cytoplasmic tail (C-tail) of SMO to promote PKA-C binding. Based on  
79 these observations, we proposed that active, phosphorylated SMO binds to and sequesters PKA-  
80 C within the cilium, which prevents phosphorylation of GLI and thereby promotes GLI activation<sup>24</sup>.

81

82 Here we uncover a critical and unexpected component of the SMO / PKA-C regulatory mechanism  
83 in which SMO physically blocks PKA-C enzymatic activity. We show that the SMO proximal C-tail  
84 (pCT) acts as a decoy PKA-C substrate that binds to and occludes the kinase active site, thereby  
85 preventing phosphorylation of PKA-C targets. SMO is, to our knowledge, the first example of a  
86 GPCR that functions as a direct PKA-C inhibitor. However, this decoy substrate mechanism  
87 appears to apply more generally to transmembrane receptors and kinases in other signaling  
88 pathways.

89

## 90 RESULTS

91

### 92 SMO binds and inhibits PKA-C as a pseudosubstrate

93

94 The principal regulators of PKA-C activity within cells are PKA regulatory (PKA-R) subunits<sup>25</sup> and  
95 the heat-stable protein kinase inhibitor (PKI) proteins<sup>26</sup>. PKI proteins and type I (PKA-RI)

96 regulatory subunits operate as pseudosubstrates that bind within the PKA-C active site but cannot  
97 undergo phosphorylation. As a result, the enzyme's phosphoryl transfer and substrate turnover  
98 cycle is interrupted<sup>25-28</sup>. PKA-R / PKA-C holoenzymes dissociate upon cAMP binding to PKA-R,  
99 releasing catalytically active PKA-C<sup>25</sup>. In contrast, PKI proteins interact with PKA-C independently  
100 of cAMP levels<sup>26</sup>. Despite their divergent regulatory influences, PKI and PKA-RI engage the PKA-  
101 C active site cleft using similar sequence motifs<sup>25,28</sup>.

102  
103 Inspection of the mouse SMO sequence revealed a region within the pCT (residues 615-638) that  
104 bears the hallmarks of a PKA-C pseudosubstrate (Fig. 1a). First, in contrast to canonical PKA-C  
105 substrates, which contain a serine or threonine at a canonical phosphorylation site (P-site)<sup>29</sup>, SMO  
106 possesses a non-phosphorylatable residue, alanine, at this position. Second, SMO contains  
107 arginines at the P-2 and P-3 positions that are essential in other pseudosubstrates (PKI and PKA-  
108 RI) for binding the PKA-C active site<sup>30-33</sup>. Third, SMO contains a hydrophobic residue, isoleucine,  
109 at P+1 and a bulkier aromatic residue, tryptophan, at P-13, both of which contribute to high-affinity  
110 PKI interactions with PKA-C<sup>34-36</sup>. Finally, SMO harbors a predicted  $\alpha$ -helical sequence N-terminal  
111 to the pseudosubstrate region (Fig. 1a), resembling a domain in PKI that is required for high-  
112 affinity interactions with PKA-C<sup>37,38</sup>. Based on these observations and the studies described  
113 below, we refer to SMO residues 615-638 as the "SMO PKI motif".

114  
115 We hypothesized that SMO utilizes its PKI motif as a pseudosubstrate to bind and inhibit PKA-C,  
116 thereby activating GLI. Consistent with this hypothesis, residues 615-637 of mouse SMO are  
117 essential for communication with GLI<sup>39</sup>, although the structure, function, and interacting partner(s)  
118 of this SMO region are all undefined. Furthermore, the P, P+1, P-2, P-3, and P-13 residues critical  
119 for PKA-C pseudosubstrate function in *bona fide* PKI proteins are highly conserved among SMO  
120 orthologs (Extended Data Fig. 1), suggestive of a central role in SMO functionality.

121  
122 We measured the affinity of the SMO PKI motif for PKA-C $\alpha$ , the best-studied and most  
123 ubiquitously expressed PKA-C isoform<sup>27</sup>, using fluorescence polarization assays. A fluorescently  
124 labeled peptide encompassing the SMO PKI motif (standard SMO peptide, Fig. 1a, red) bound  
125 saturably to purified human ( $K_D = 823$  nM, Fig. 1b (top)) or mouse ( $K_D = 911$  nM, Extended Data  
126 Fig. 2a (left)) PKA-C $\alpha$ . These interactions showed pseudosubstrate characteristics: they were  
127 strongly ATP-dependent<sup>40</sup> ( $EC_{50}$  for ATP = 19.2  $\mu$ M (human) or 0.59  $\mu$ M (mouse), Fig. 1b (bottom)  
128 and Extended Data Fig. 2a) (right)) and were blocked by alanine substitution of the P-2 / P-3  
129 arginines and the P-13 tryptophan, hereafter referred to as the "WRR mutation" (Fig. 1c, Extended  
130 Data Fig. 2b). Along similar lines, direct surface plasmon resonance (SPR) binding studies  
131 revealed that a recombinant protein encompassing the entire 93 amino-acid SMO pCT bound  
132 specifically to PKA-C $\alpha$  (Fig. 1d). These interactions displayed fast on- and off-rates with transient  
133 kinetics, and steady-state analysis of the binding data revealed a  $K_D$  of 835 nM (Extended Data  
134 Fig. 2c,d). Consistent with our peptide binding studies, PKA-C interactions with the SMO pCT  
135 depended strictly on ATP and  $MgCl_2$  (Extended Data Fig. 2e), and only minimal PKA-C binding  
136 was observed for the WRR mutant (Fig. 1e, Extended Data Fig. 2c,d). Interestingly, the above  
137 SMO PKI binding assays revealed weaker interactions with PKA-C than observed for  
138 conventional pseudosubstrates ( $K_D = 1.1$  nM for PKI $\alpha$ (5-24) peptide<sup>41</sup>). We discuss the  
139 biochemical basis and biological significance for these affinity differences below.



140

141 We next studied the interaction between PKA-C and the SMO PKI motif at a structural level using  
142 nuclear magnetic resonance (NMR) spectroscopy. Binding of pseudosubstrate sequences from  
143 either SMO or PKI $\alpha$  induced similar overall chemical shift perturbations throughout the PKA-C  
144 kinase core (Fig. 2a, Extended Data Fig. 2f). SMO PKI peptides also blocked PKA-C enzymatic  
145 activity *in vitro*, as assessed via a PKA-C substrate phosphorylation assay<sup>42</sup>, with an extended  
146 length peptide (Fig. 1a) inhibiting PKA-C more profoundly (Fig. 2b). In keeping with this trend, the  
147 recombinant SMO pCT (Extended Data Fig. 2g,h) required 5-10-fold lower concentrations to  
148 efficiently block PKA-C activity compared to SMO PKI peptides (24-38 amino acids in length) (IC<sub>50</sub>  
149 = 10.9  $\mu$ M for pCT vs. 50-125  $\mu$ M for SMO PKI peptides, Fig. 2c). Consistent with a  
150 pseudosubstrate mode of inhibition, introducing the WRR mutation into the SMO pCT restored  
151 PKA-C activity (Fig. 2d). These data indicate that the SMO PKI motif is sufficient to inhibit PKA-C  
152 substrate phosphorylation, with additional sequences in the pCT enhancing the efficiency of  
153 inhibition.

154

### 155 **The SMO PKI motif is required for Hh signal transduction**

156

157 We next asked whether the SMO PKI motif contributes to PKA-C binding and inhibition in living  
158 systems. Our initial studies involved a simplified HEK293 cell model for SMO / PKA-C regulation  
159 and employed truncated SMO constructs (either SMO657 or SMO674, with the number indicating  
160 the C-terminal-most residue) that exhibit improved expression and biochemical stability compared  
161 to full-length SMO<sup>24</sup>. We used bioluminescence resonance energy transfer (BRET)<sup>43,44</sup> to detect  
162 interactions between nanoluciferase (nanoluc)-tagged SMO and YFP-tagged PKA-C constructs  
163 in a cellular environment<sup>24</sup>. In this assay, PKA-C exhibited strong, specific BRET with wild-type  
164 SMO657, but not with SMO657 harboring the WRR mutation (Fig. 3a). Coimmunoprecipitation  
165 assays confirmed these results (Extended data Fig. 3a). Similarly, the WRR mutation prevented  
166 SMO674 from colocalizing with PKA-C at the membrane<sup>24</sup>, as determined by live-cell confocal  
167 microscopy (Fig. 3b).

168

169 We next assessed the impact of the SMO PKI motif on PKA-C activity in cells using a model PKA-  
170 C substrate, the cyclic AMP response element binding protein (CREB) transcription factor<sup>45</sup>, and  
171 a CREB transcriptional reporter assay. This experimental paradigm entails overexpression of  
172 PKA-C at levels exceeding those of endogenous PKA-R, thereby minimizing potentially  
173 confounding contributions from heterotrimeric G protein- and cAMP-containing cascades<sup>24</sup>.  
174 Under these conditions, wild type SMO674 blocked PKA-C-mediated CREB reporter activation  
175 while SMO674 harboring the WRR mutation failed to do so (Fig. 3c). We observed similar effects  
176 with serine substitution of the P-site alanine (A635S, Fig. 3c and Extended data Fig. 3a), which  
177 converts pseudosubstrates to substrates and thereby promotes their dissociation from the PKA-  
178 C active site<sup>33,46</sup>.

179

180 We extended the above findings to more physiological cellular models of Hh signaling in primary  
181 cilia, using SMO constructs with full-length unmodified C-termini. We studied SMO / PKA-C  
182 colocalization in cilia using inner medullary collecting duct (IMCD3) cells, a robustly ciliated kidney  
183 cell line that is used extensively in studies of ciliary Hh signal transduction<sup>24,47-49</sup>. Upon Hh

184 pathway activation, SMO accumulates in IMCD3 primary cilia<sup>47-49</sup>, where it colocalizes with PKA-  
185 C<sup>24</sup>. In contrast, PKA-C displayed dramatically reduced colocalization in cilia with SMO containing  
186 the WRR mutation (Extended Data Fig. 3b). The WRR mutation also prevented interaction of  
187 SMO with PKA-C (expressed at near-endogenous levels<sup>24</sup>) in these ciliated cells (Fig. 3d).

188

189 To capture the entire process of Hh signal transduction from the cell surface to the nucleus, we  
190 used mouse embryonic fibroblasts (MEFs) and a GLI transcriptional reporter assay<sup>11,50,51</sup>. This  
191 model strictly requires SMO, PKA-C, GLI, and an intact cilium<sup>50,52,53</sup>. In *Smo*<sup>-/-</sup> MEFs, transfection  
192 of wild-type SMO enabled strong GLI transcriptional responses to Hh ligands, whereas the WRR  
193 and A635S mutants were almost completely devoid of activity (Fig. 3e).

194

195 Mutations in the SMO PKI motif specifically affect binding to and inhibition of PKA-C, based on  
196 the following control studies. First, the expression levels and electrophoretic mobilities of these  
197 mutants were similar to those of their wild-type counterparts (Extended Data Fig. 3a and 4a,b,d),  
198 and the mutants localized correctly to primary cilia (Extended Data Fig. 3b, 4c). In addition, the  
199 SMO mutations only minimally affected BRET with nanobody 2 (NbSmo2, Fig. 3a), which  
200 selectively binds the active state of SMO via the cytoplasmic face of its seven-transmembrane  
201 (7TM) domain<sup>24</sup>. Finally, the mutants underwent normal SMO activity-dependent phosphorylation  
202 by GRK2/3 kinases<sup>24,54</sup> (Extended Data Fig. 4d). These data rule out possible nonspecific effects  
203 of the mutations on SMO expression, trafficking, conformational activation, or ability to serve as  
204 a GRK2/3 substrate.

205

206 To examine the role of the SMO PKI motif in Hh signal transduction *in vivo*, we studied the  
207 specification of slow muscle cell types in zebrafish embryos, a widely utilized model of  
208 morphogenetic Hh signal transduction during vertebrate development<sup>24,55,56</sup>. While expression of  
209 wild-type SMO restored correct muscle specification to *smo*<sup>-/-</sup> zebrafish, the WRR or A635S  
210 mutants did not (Fig. 3f, Extended Data Table 2).

211

212 Taken together, our studies demonstrate a requirement for PKA-C pseudosubstrate interactions  
213 in SMO inhibition of PKA-C, and activation of GLI, during Hh signal transduction in both cultured  
214 cells and organisms.

215

### 216 **An avidity-based mechanism for SMO inhibition of PKA-C**

217

218 PKA-C interactions with the SMO PKI motif, while essential for Hh signal transduction (Fig. 3),  
219 appear weaker ( $K_D = 823\text{-}911$  nM for SMO PKI peptides, Fig. 1b, Extended Data Fig. 2a,d) than  
220 those with a canonical PKA-C pseudosubstrate, ( $K_D = 1.1$  nM for PKI $\alpha$ (5-24) peptide<sup>41</sup>). SMO /  
221 PKA-C interactions, however, are also influenced by sequences outside the PKI motif, indicating  
222 that they are more favorable *in vivo* than the *in vitro* measurements suggest. Several lines of  
223 evidence support this proposal. First, SMO mutations known to reduce PKA-C interactions *in vivo*,  
224 including deletion of a predicted amphipathic helix spanning residues 570-581 or alanine  
225 substitution of GRK2/3 phosphorylation sites<sup>24</sup>, map to non-PKI regions of the pCT (summarized  
226 in Fig. 4a). Second, SMO pCT interactions with PKA-C are enhanced by the distal SMO C-tail  
227 (dCT, residues 658-793)<sup>24</sup>, demonstrating that this region harbors additional PKA-C binding

228 determinants. Accordingly, in HEK293 cells, PKA-C interactions with SMO containing its full-  
229 length C-tail are only partially blocked by the WRR mutation (Fig. 4b), in contrast to the near-  
230 complete loss of interaction with SMO lacking the dCT (Fig. 3a). Finally, a tiled SMO C-tail peptide  
231 microarray identified several PKA-C-binding sequences in addition to the PKI motif, including one  
232 in the dCT with PKI-like attributes (Fig. 4c, Extended Data Fig. 5).

233

234 Taken together, our data support an avidity-based mechanism for SMO / PKA-C binding. A set of  
235 ancillary interactions cooperate to stabilize the core binding events between the SMO PKI motif  
236 and the PKA-C active site. This avidity-based mechanism may provide the essential link between  
237 SMO activation and disruption of PKA-C phosphoryl transfer during Hh signal transduction.

238

## 239 DISCUSSION

240

241 SMO inhibition of PKA-C is a central aspect of Hh signal transduction in development and disease.  
242 Instead of obeying the existing paradigms for GPCR-PKA signaling, SMO enjoys a private  
243 signaling pathway whereby it directly binds PKA-C as a pseudosubstrate. This both restricts  
244 access of PKA-C to soluble targets and extinguishes its enzymatic activity. A PKI motif encoded  
245 by the SMO cytoplasmic domain is central to this mechanism in two ways. First, the PKI motif  
246 sequesters PKA-C away from GLI by promoting SMO / PKA-C interactions, and thus recruitment  
247 of PKA-C to the membrane. Second, the PKI motif occludes the PKA-C active site, interrupting  
248 catalysis. By utilizing this two-pronged strategy, SMO can efficiently block PKA-C-mediated  
249 phosphorylation, activate GLI, and promote transcription of Hh pathway target genes.

250

251 Based on our findings, we propose a revised model for Hh signal transduction downstream of  
252 SMO (Fig. 4d). In the pathway “off” state, SMO is in an inactive conformation<sup>11,51,57,58</sup>. As a result,  
253 SMO cannot be phosphorylated efficiently by GRK2/3<sup>24,54</sup>, and exists at low levels in the ciliary  
254 membrane<sup>59-61</sup>. We expect interactions between PKA-C and the SMO PKI motif to be unfavorable  
255 under these conditions due to their distinct subcellular localizations and relatively weak affinity. In  
256 the pathway “on” state, Hh-mediated inactivation of PTCH1 enables SMO to bind its endogenous  
257 sterol ligands and adopt an active conformation<sup>11-13,51</sup>. Consequently, SMO undergoes  
258 phosphorylation by GRK2/3 and accumulates in the cilium, bringing SMO in close proximity to  
259 ciliary PKA-C. This allows SMO to bind PKA-C via its PKI motif, which both sequesters PKA-C at  
260 the ciliary membrane<sup>24</sup> and blocks PKA-C-mediated catalysis. These interactions are facilitated  
261 by other PKA-C-binding sequences in the SMO pCT and dCT. We expect the interactions are  
262 also enhanced by the membrane itself, which restricts diffusion of proteins to two dimensions and  
263 can thereby dramatically increase effective concentrations relative to soluble compartments<sup>62</sup>.  
264 Additionally, SMO activation could conceivably decrease ciliary cAMP via coupling to inhibitory  
265 ( $G_{\alpha_{i/o/z}}$ ) G protein cascades<sup>51,63,64</sup> or by triggering the ciliary exit of GPR161, a constitutively active  
266 GPCR that couples to stimulatory ( $G_{\alpha_s}$ ) G proteins<sup>47,49,65</sup>. These processes, while not absolutely  
267 required for Hh signal transduction<sup>65-70</sup>, may reduce levels of free (non-PKA-R-bound) PKA-C in  
268 cilia<sup>71</sup>, and thereby aid the SMO PKI motif in binding and inhibiting the ciliary pool of PKA-C. Thus,  
269 activation of SMO prevents PKA-C substrate phosphorylation via a host of auxiliary interactions  
270 and regulatory influences that assist the essential pseudosubstrate action of the SMO PKI motif.

271

272 Our study helps explain a crucial but enigmatic aspect of Hh signal transduction, namely how  
273 PKA-C is inhibited, and GLI activated, only when the Hh pathway is in an “on” state. Indeed, our  
274 findings are consistent with a number of prior observations, such as that inactivation of GRK2/3  
275 decreases SMO / PKA-C interactions<sup>24</sup>, blocks SMO / PKA-C colocalization at the membrane<sup>24</sup>,  
276 and abolishes Hh signal transduction<sup>56,72,73</sup>. Based on our model, these effects can be explained  
277 by GRK2/3 inhibition weakening the SMO / PKA-C interaction below a critical threshold such that  
278 the PKI motif cannot efficiently engage the enzyme’s active site. Furthermore, our findings  
279 suggest that SMO / PKA-C interactions are appropriately tuned: If the SMO PKI motif were to bind  
280 PKA-C with high affinity, the Hh pathway could misfire, as PKA-C would be inhibited (and GLI  
281 dephosphorylated) even when SMO is inactive. Conversely, reducing the affinity of PKA-C for the  
282 SMO PKI motif, as occurs with the SMO WRR or A635S mutations, prevents the SMO active  
283 state from inhibiting PKA-C and thereby hinders GLI transcription. Future structural studies of full-  
284 length SMO / PKA-C complexes will provide a more detailed understanding of how the SMO pCT  
285 engages PKA-C, and may also reveal precisely how GRK2/3 facilitates these interactions.

286  
287 The mechanism described above represents, to our knowledge, an unprecedented mode of  
288 GPCR-kinase communication. It is, however, remarkably similar to a strategy used by another  
289 critical developmental and cancer pathway: the Wnt cascade<sup>74-77</sup> (Extended Data Fig. 6). During  
290 the initial steps of Wnt signal transduction at the plasma membrane, the cytoplasmic tail of LDL  
291 receptor-related proteins 5/6 (LRP5/6) serves as a pseudosubstrate inhibitor of GSK-3 $\beta$  kinases.  
292 This blocks phosphorylation and degradation of the transcriptional coactivator  $\beta$ -catenin<sup>78-81</sup>.  
293 Moreover, the LRP5/6 tail binds GSK-3 $\beta$  with low affinity, but Wnt pathway activation enhances  
294 this interaction through phosphorylation of the LRP5/6 tail as well as recruitment of GSK-3 $\beta$ -  
295 containing protein complexes to the membrane<sup>78-80</sup>. Thus, in both the Hh and Wnt cascades, a  
296 phosphorylated receptor tail sequesters and competitively inhibits a kinase via an avidity-based  
297 mechanism. It was unexpected that these two pathways, which utilize distinct molecular  
298 components and rely on disparate subcellular environments (cilium vs. plasma membrane)<sup>21,82</sup>,  
299 nevertheless share a common mechanism for intracellular signal transduction. Why such a  
300 mechanism evolved to carry out central steps in these pathways is presently unclear. One  
301 possibility is that it serves to spatially restrict the kinase-inhibiting effects of upstream receptors  
302 and thereby avoid pleiotropic effects of inhibiting these kinases globally. This may help to ensure  
303 signaling specificity and reduce untoward crosstalk with other pathways<sup>75,78,81</sup>. It is also possible  
304 that such a mechanism is particularly well-suited to the embryogenesis- and homeostasis-related  
305 functions of Hh and Wnt signaling. In any event, the use of a similar strategy during Hh and Wnt  
306 signal transduction hints at a more general applicability to a range of transmembrane receptors  
307 and kinases. Given the ubiquity of these proteins in metazoan physiology and disease<sup>22,23,28</sup>, and  
308 their prevalence as therapeutic targets<sup>83,84</sup>, this represents an exciting area for future study.

309  
310

## 311 **METHODS:**

312

313 **Cell culture and zebrafish husbandry.** HEK293FT cells, IMCD3 Flp-in cells, *Smo*<sup>-/-</sup> MEFs, and  
314 HEK293-Freestyle cells were grown as previously described<sup>24</sup>. Stably transfected HEK293 Flp-in  
315 T-rex cells were constructed and maintained as previously described<sup>11</sup>. IMCD3 stable line



316 expressing SMO(WRR)-IRES-PKACmNG produced as previously described, others (PKAC-mNG  
317 and  $\beta$ 2ARNb80-mNG) already described. Zebrafish were maintained as previously described<sup>24</sup>.

318

319 **Antibodies, small molecules, and other reagents.** SAG21k was a gift from P. Beachy.  
320 Cmpd101 was obtained from Hello Bio. Rabbit anti-GFP (which also detects YFP) was obtained  
321 from Thermo Fisher Scientific (A11122). Mouse anti-Arl13b was obtained from Antibodies Inc (75-  
322 287). Alexa 647-conjugated M1 FLAG antibody and M1 FLAG affinity resin were prepared in-  
323 house. Control or ShhN conditioned medium was prepared from stably transfected HEK293 cells  
324 as previously described<sup>24</sup>. Dual-luciferase assay was obtained from Promega. Coelenterazine h  
325 was obtained from NanoLight Technology (301–500). Furimazine was obtained from AOBIOUS  
326 (AOB36539). For transfection studies, TransIT 2020 and TransIT 293 were obtained from Mirus  
327 Bio.

328

329 **DNA constructs.** For expression and purification of the SMO pCT in *E. coli*, the ShhN gene was  
330 excised from ShhN / pHTSHP<sup>51</sup> and replaced with residues 565-657 of mouse SMO  
331 (<sup>565</sup>KRIKK...<sup>657</sup>PEEQAN), downstream of the MBP-His<sub>8</sub>-SUMO tags in the vector pHTSHP, or for  
332 GST-constructs in the vector pGexKG. GST-PKI construct in pGexKG was previously described<sup>85</sup>.  
333 The resulting construct was termed SMO pCT(565-657). The SMO655-nanoluc, SMO674, and  
334 SMO-nanoluc constructs (all in pVLAD6, with N-terminal hemagglutinin signal sequence and  
335 FLAG tag) were previously described<sup>24</sup>. Full-length SMO (in pGEN, with C-terminal myc tag) was  
336 previously described<sup>86</sup>. Mouse PKA-C $\alpha$ -YFP, PKA-Rl $\alpha$ -YFP, and NbSmo2-YFP constructs in  
337 pVLAD6 were previously described<sup>24</sup>. Barrestin1-YFP in pCDNA3.1-zeo was previously  
338 described<sup>24</sup>. To construct IMCD3 Flp-in stable lines coexpressing FLAG-tagged mutant SMO with  
339 mNeonGreen-tagged PKA-C $\alpha$  (using an IRES element), the previously described construct SMO-  
340 IRES-PKAC $\alpha$ mNG / pEF5-FRT<sup>24</sup> was modified to introduce the WRR mutation into SMO. To  
341 construct stable Flp-in HEK293 cell lines coexpressing wild-type or mutant SMO674 (which  
342 includes an N-terminal hemagglutinin signal sequence and FLAG tag) along with GFP-tagged  
343 PKAC $\alpha$ , we cloned a SMO674-IRES-PKAC $\alpha$ GFP cassette into the pCDNA5-FRT-TO vector.  
344 Untagged human and mouse PKAC $\alpha$  constructs in the vector pRSETb were previously  
345 described<sup>85</sup>. All mutant DNA sequences were prepared via PCR-based mutagenesis, cloned into  
346 their respective vector backbones via Gibson assembly, and verified by Sanger sequencing.

347

348 **Peptide synthesis.** SMO PKI peptides (standard = SADVSSAWAQHVTKMVARRGAILP;  
349 extended = SADVSSAWAQHVTKMVARRGAILPQDVSVTPVATPVPP) were prepared via  
350 standard solid-phase synthesis by either GenScript or Elim Bio, purified via reversed-phase HPLC  
351 to  $\geq$ 85% purity, and the sequence / molecular mass confirmed by mass spectrometry. For  
352 fluorescence polarization assays, a FAM fluorophore and 3xPEG linker were added to the N-  
353 terminus of the standard SMO PKI peptide during synthesis. PKI $\alpha$ (5-24) Peptide  
354 (TTYADFIASGRTGRRNAIHD) was synthesized as described for the SMO-PKI peptides by  
355 GeneCust (Boynes, France).

356

357 **Fluorescence polarization assays.** Human or mouse PKA-C $\alpha$  subunits were purified as  
358 previously described<sup>87</sup>. In addition, the protein obtained from the S200 was further purified via  
359 cation exchange chromatography. For this, the S200 peak fractions were pooled and dialyzed

360 overnight into MonoS buffer (20 mM  $\text{KH}_2\text{PO}_4$  pH 6.5, 5 mM DTT) before loading onto a MonoS  
361 cation exchange column. PKA-C $\alpha$  was eluted with a gradient of 0-300mM KCl in MonoS buffer.  
362 Binding of a SMO peptide containing the PKI motif was investigated by fluorescence polarization  
363 (FP). Assay buffer for all FP experiments consisted of 50 mM MOPS pH 7, 35 mM NaCl, 10 mM  
364  $\text{MgCl}_2$ , 1 mM DTT and 0.005% Triton X-100 with the addition of 1 mM ATP in the PKA-C titrations.  
365 Experiments were performed by adding 50  $\mu\text{l}$  of the titration component (PKA-C or ATP) to 150  
366  $\mu\text{l}$  of FAM-SMO containing solution. For SMO/PKA-C binding experiments, a two-fold dilution  
367 series from 16 $\mu\text{M}$  to 0 $\mu\text{M}$  of either mouse or human PKA-C $\alpha$  was added to 40 nM FAM-SMO. To  
368 assess the ATP dependence of SMO binding to PKA-C, a titration with varying the ATP  
369 concentration from 0 to 1 mM (human PKA-C $\alpha$ ) or 12.8  $\mu\text{M}$  (mouse PKA-C $\alpha$ ) was used with  
370 keeping PKA-C at 3  $\mu\text{M}$  and FAM-SMO at 25 nM. Readings were taken with a Tecan Genios plate  
371 reader using black flat bottom 96-well Costar plates. Each experiment was carried out in at least  
372 triplicate with FAM readings at 485 nm excitation and 535 nm emission.

373  
374 **Peptide arrays.** Peptide arrays were synthesized with a MultiPep Flexible Parallel Peptide  
375 Synthesizer (Intavis Bioanalytical Instruments, Germany). The blots were probed with mouse or  
376 human PKA C $\alpha$  protein, purified as described above for “Fluorescence polarization assays”.  
377 Unless noted otherwise all steps were carried out at room temperature. The blots were initially  
378 soaked with 100% ethanol for 5 minutes followed by 5 times 5-minute washes with water. All  
379 subsequent washes were carried out for 5 minutes 5 times with TTBS. The membranes were  
380 washed with TTBS, blocked with 5% milk in TTBS for 1 hour and washed again with TTBS. They  
381 were then soaked with TTBS containing 2  $\mu\text{g}$  PKA-C $\alpha$ , 5% milk, 10 mM  $\text{MgCl}_2$  and 1mM ATP  
382 overnight at 4° C. The next day the blots were washed, blocked with 5% milk in TTBS and washed  
383 again before incubation overnight at 4° C with TTBS containing 5% milk and a primary PKA-  
384 C antibody (generated in-house previously). The next day the blots were washed, then incubated  
385 with an HRP-conjugated anti-rabbit antibody (Prometheus<sup>TM</sup>) in 5% milk TTBS for one hour  
386 followed by a final round of washes with TTBS. The membranes were finally covered with  
387 SuperSignal West Pico PLUS Chemiluminescent Substrate for detection of HRP (Thermo  
388 Scientific # 34580) and imaged with a ChemiDoc MP Imaging System from BIO RAD. A  
389 representative array image (representative of two separate trials) is shown; we excluded from  
390 analysis any spots that were not observed consistently across replicates.

391  
392 **Surface plasmon resonance (SPR).** Human PKA-C $\alpha$  was overexpressed in *E. coli* BL21(DE3)  
393 cells after induction with 0.4 mM IPTG for 16 h at RT using the expression vector pRSETb-  
394 hPKAC $\alpha$  and then purified by affinity chromatography using an IP20-resin as described earlier<sup>88</sup>.  
395 GST-PKI, GST-SMO pCT wt and WRR mutant were overexpressed in *E. coli* BL21(DE3) for 16  
396 hr at room temperature, and the GST fusion proteins were purified using Protino glutathione  
397 agarose 4B according to the manufacturer’s instruction (Macherey-Nagel). SPR interaction  
398 studies were performed according to previous studies<sup>46,85</sup>. Briefly, the interaction studies were  
399 performed in running buffer (20 mM MOPS, pH 7.0, 150 mM NaCl, 50  $\mu\text{M}$  EDTA, 0.005% P20  
400 surfactant) at 25 °C using a Biacore 3000 instrument (GE Healthcare). For measurements  
401 involving ATP/ $\text{MgCl}_2$ , the buffer was supplemented with 1 mM ATP and 10 mM  $\text{MgCl}_2$ . Polyclonal  
402 anti-GST antibody (Carl Roth, 3998.1) was covalently immobilized to all four flow cells of a CM5

403 sensorchip (GE Healthcare) to a level of 8,000 response units (RU) via standard NHS/EDC amine  
404 coupling. Each measurement cycle started with the sequential capture of 60–130 RU of GST-PKI  
405 and 500–1,000 RU of GST-SMO-RLG wt and GST-SMO-RLG WRR mutant on separate flow cell  
406 (flow rate 10  $\mu$ L/min). Interaction analysis was then initiated by the injection of increasing  
407 concentrations of human PKA C $\alpha$  (156 nM – 10  $\mu$ M) at a flow rate of 30  $\mu$ L/min for 120 or 240 s  
408 (association) followed by 120 or 240 s dissociation with buffer without PKA C $\alpha$ . Nonspecific  
409 binding was removed by subtracting SPR signals from a blank flow cell (without GST-protein) and  
410 additional buffer blank runs without PKA C $\alpha$  (double referencing) employing BIAevaluation  
411 Software 4.1.1 (Cytiva, Marlborough, MA, USA). After each cycle, the sensorchip was  
412 regenerated by injecting up to 5 times with 10 mM glycine, pH 1.9 or 2.2, to remove the GST-  
413 fusion proteins from the antibody surfaces until the baseline level was reached. Steady-state  
414 analysis was performed with GraphPadPrism with a one-site binding (hyperbola) model as  
415 previously described<sup>85</sup>.

416  
417 **NMR spectroscopy.** Recombinant human PKA-C $\alpha$  (PRKACA, uniprot P17612) was expressed  
418 and purified as reported<sup>89,90</sup>. Briefly, transformed *E.coli* BL21 (DE3) pLysS (Agilent) cells were  
419 cultured in deuterated (<sup>2</sup>H) M9 minimal medium supplemented with <sup>15</sup>NH<sub>4</sub>Cl. Protein  
420 overexpression was initiated by adding 0.4 mM of isopropyl  $\beta$ -D-1-thiogalactopyranoside (IPTG)  
421 and carried out for 12 hours at 20 °C. The collected cell pellet was then resuspended in 50 mM  
422 Tris-HCl pH 8.0, 30 mM KH<sub>2</sub>PO<sub>4</sub>, 200 mM NaCl, 5 mM  $\beta$ -mercaptoethanol, 0.15 mg/ mL lysozyme,  
423 200  $\mu$ M ATP, DnaseI, and protease inhibitor (Sigma) and pass through a French press (2 times).  
424 The cell resuspension was then cleared by centrifugation (18,000 rpm for 45 minutes), and the  
425 supernatant was incubated overnight with Ni<sup>2+</sup>-NTA resin (Thermo Fisher). His-tagged PKA-C $\alpha$   
426 was eluted using 50 mM Tris-HCl pH 8.0, 30 mM KH<sub>2</sub>PO<sub>4</sub>, 100 mM NaCl, 5 mM  $\beta$ -  
427 mercaptoethanol, 1 mM phenylmethylsulfonyl fluoride (PMSF) supplemented with 200 mM of  
428 imidazole. The His-tag was removed during an overnight dialysis step performed in 20 mM  
429 KH<sub>2</sub>PO<sub>4</sub> (pH 6.5), 25 mM KCl, 5 mM  $\beta$ -mercaptoethanol, 0.1 mM PMSF, using stoichiometric  
430 quantities of recombinant tobacco etch (TEV) protease. Finally, cationic exchange  
431 chromatography was performed to separate the three different isoforms of PKA-C $\alpha$ , representing  
432 the three different phosphorylation states of the kinase, using a linear gradient of KCl in 20 mM  
433 KH<sub>2</sub>PO<sub>4</sub> at a pH of 6.5 (HiTrap Q-SP column, GE Healthcare Life Science). All the NMR  
434 experiments were performed using PKA-C $\alpha$  isoform II, corresponding to phosphorylation at S10,  
435 T197, and S338 residues<sup>91</sup>. The purity of the protein preparation was tested using SDS-PAGE  
436 electrophoresis and Mass spectrometry analysis (purity >97%).

437  
438 A portion of the lyophilized extended SMO PKI peptide (see above) was resuspended in 20 mM  
439 KH<sub>2</sub>PO<sub>4</sub> (pH 6.5), 90 mM KCl, 10 mM MgCl<sub>2</sub>, 10 mM DTT, 1 mM NaN<sub>3</sub>, to a final concentration of  
440 4 mM. The NMR experiments were performed on 100  $\mu$ M uniformly <sup>2</sup>H, <sup>15</sup>N-labeled PKA-C $\alpha$   
441 sample in 20 mM KH<sub>2</sub>PO<sub>4</sub>, 90 mM KCl, 10 mM MgCl<sub>2</sub>, 10 mM DTT, 1 mM NaN<sub>3</sub> at pH of 6.5 and  
442 saturated with 12 mM of a non-hydrolyzable ATP analog (ATP $\gamma$ N). Modified [<sup>1</sup>H-<sup>15</sup>N]-TROSY-  
443 HSQC spectra were acquired on a Bruker Advance III spectrometer operating at a proton  
444 frequency of 850 MHz, equipped with a TCI cryoprobe, at an acquisition temperature of 300K.  
445 First, a spectrum of ATP $\gamma$ N-saturated PKA-C $\alpha$  complex (PKA-C $\alpha$ /ATP $\gamma$ N) was recorded with 2048



446 (proton) and 128 (nitrogen) complex points. Stoichiometric amounts of SMO PKI peptide  
447 (hereafter referred to as SMO-PKI) were then added to the PKA-C $\alpha$ /ATP $\gamma$ N complex until  
448 saturation (1:0, 1:1, 1:2, and 1:4 SMO-PKI:PKA-C/ATP $\gamma$ N molar ratio), with a concentration of  
449 SMO-PKI ranging from 0.1 to 0.4 mM. All the spectra were processed using NMRPipe<sup>92</sup>, and  
450 visualized using NMRFAM-SPARKY software<sup>93</sup>. Combined chemical shift perturbation (CSPs)  
451 were calculated using the <sup>1</sup>H and the <sup>15</sup>N chemical shift derived from the PKA-C $\alpha$ /ATP $\gamma$ N complex  
452 and the 1:4 SMO-PKI:PKA-C/ATP $\gamma$ N complex. The CSPs was calculated using the following  
453 equation<sup>94</sup>:

$$\Delta\delta = \delta_{SMO} - \delta_{ATP\gamma N} = \sqrt{(\Delta\delta H)^2 + (0.154 \times \Delta\delta N)^2}$$

454  
455 The PKI $\alpha$ (5-24) CSPs were originally published earlier<sup>90</sup> and are included here for reference.

456

457 **Purification of SMO pCT for PKA-C activity assays.** MBP-His<sub>8</sub>-SUMO-tagged SMO pCT (SMO  
458 pCT(565-657) / pHTSHP) was transformed into BL21 (DE3) *E coli* and grown to OD<sub>600</sub> = ~0.5-1.0  
459 in 1 L terrific broth (TB) with ampicillin at 37°C in 2800ml baffled Fernbach flasks until. IPTG was  
460 then added to 0.4mM and the temperature lowered to 18°C for 18 hours. Cells were harvested by  
461 centrifugation, snap-frozen in liquid nitrogen, and stored at -80°C. Cell pellets were resuspended  
462 in 20ml binding buffer (50mM Tris pH 8.0, 300mM NaCl, 10mM imidazole, protease inhibitors  
463 (Pierce)) at 4°C with stirring. Lysozyme was added at 1mg/ml as well as benzonase (10,000X,  
464 Sigma), and samples were lysed by sonication. Lysates were clarified by centrifugation at 40,000  
465 x g, 30 min, 4°C. Supernatant was run by gravity over a column of 6ml NiNTA affinity resin  
466 (Qiagen) pre-equilibrated in binding buffer. The column was washed twice with 5 column volumes  
467 of wash buffer (50mM Tris pH 8.0, 300mM NaCl, 25mM imidazole) and eluted with four successive  
468 1 column volumes of elution buffer (50mM Tris pH 8.0, 300mM NaCl, 250mM imidazole). Protein  
469 content of fractions was estimated by Quickstart Bradford assay and purity determined by SDS-  
470 PAGE. Protein-rich fractions were pooled and cleaved by the addition of 1.4mg Ulp1 enzyme  
471 (prepared in-house) and 1mM DTT for 1 hour at room temperature. After incubation, the samples  
472 were dialyzed overnight against dialysis buffer (50mM HEPES pH 8.0, 150mM NaCl, 7mM  $\beta$ -  
473 mercapthoethanol. The completed digestion reaction was applied to NiNTA resin, washed twice  
474 with 3 column volumes of dialysis buffer, and eluted with 3 column volumes of elution buffer. The  
475 flow-through and wash fractions were pooled, centrifugated at 20,000 x g, 5 min, 4°C to pellet any  
476 insoluble material, and futher purified by loading onto a 1ml HiTrap HP SP cation exchange  
477 column pre-equilibrated in low-salt buffer (50mM HEPES pH8.0, 150mM NaCl). Column was  
478 washed extensively with low salt buffer and protein was eluted with a gradient to high-salt buffer  
479 (50mM HEPES pH 8.0, 1.2M NaCl). Fractions containing the cleaved SMO pCT were pooled,  
480 concentrated, and injected onto a Superdex 200 (10/300) gel filtration column equilibrated in gel  
481 filtration buffer (50 mM HEPES pH 7.5, 300 mM NaCl). The peak fractions were collected and  
482 analyzed by SDS-PAGE. Fractions containing intact pCT were pooled, snap-frozen in liquid  
483 nitrogen, and stored at -80°C. For the experiments in Fig. 2d, wild-type or mutant pCT proteins  
484 were purified by NiNTA affinity as described above and used directly in PKA-C activity assays.

485

486 **In vitro PKA-C activity assays.** For *in vitro* PKA-C activity assays the recombinant mouse PKA  
487 catalytic subunit (C $\alpha$ ) was overexpressed in *E. coli* BL21(DE3) cells after induction with 0.4 mM  
488 IPTG for 14 hr at room temperature using the expression vector pRSETb / mPKAC $\alpha$  and then

489 purified by affinity chromatography using an IP20-resin as described earlier<sup>88</sup>. PKA catalytic  
490 activity was assayed using a coupled spectrophotometric assay as described previously<sup>42</sup>. Briefly,  
491 the reaction mixture contained 100 mM MOPS (pH 7), 10 mM MgCl<sub>2</sub>, 100 μM ATP, 1 mM  
492 phosphoenolpyruvate, 15 U/mL lactate dehydrogenase, 70 U/mL pyruvate kinase, 200 mM  
493 reduced nicotinamide adenine dinucleotide, 5 mM β-mercaptoethanol with 15-30 nM Cα and  
494 260 μM Kemptide (LRRASLG; GeneCust) as a substrate. Formation of PKA-C:SMO complex  
495 (concentration of SMO peptide or recombinant SMO pCT protein are indicated in the figures) was  
496 carried out for 3 minutes at room temperature in the assay mixture. The apparent IC<sub>50</sub> for SMO  
497 pCT were determined by fitting the concentration-dependent activity to a sigmoid dose-response  
498 model. All data were plotted as means of at least two independent experiments measured in  
499 duplicate each with standard deviation (SD).

500  
501 **MALS.** Purified SMO pCT was concentrated to 5 mg/ml and analyzed via SEC-MALS using a  
502 Superdex 75 gel chromatography column (GE Healthcare) equilibrated in gel filtration buffer (50  
503 mM HEPES pH 7.5, 300 mM NaCl) with an in-line DAWN MALS detector (Wyatt Technology.)

504  
505 **BRET.** BRET in HEK293 or IMCD3 cells was performed as previously described<sup>24</sup>. Briefly,  
506 HEK293 or IMCD3 cells were transiently transfected with nanoluc-tagged SMO (0.3 μg) along  
507 with YFP-tagged βarrestin1, PKA-Cα, or PKA-Rlα plasmids. Typically 0.1 μg of each BRET  
508 acceptor plasmid was used, with the following two exceptions: (1) Fig. 4b which examined a range  
509 of PKA-Cα DNA amounts as indicated in the figure legend; (2) Fig 3d which used 0.3 μg of PKA-  
510 Cα-YFP (corresponding to a 0.33-2.68% increase in the size of the endogenous PKA-C pool, as  
511 determined by quantitative immunoblotting<sup>24</sup>) or PKA-Rlα-YFP (which displays no BRET with  
512 SMO even though it expresses at substantially higher levels than does PKA-Cα-YFP<sup>24</sup>); Cells  
513 were replated in poly-D-lysine coated white opaque 96-well plates, loaded with 5 μM  
514 coelenterazine h (HEK293) or 10 μM furimazine (IMCD3), and analyzed for BRET on a Tecan  
515 Spark multimode plate reader. The background signal from cells expressing nanoluc-tagged SMO  
516 without BRET acceptor was subtracted from all measurements. For all BRET assays, data  
517 represent mean ± SEM from triplicate wells, and data are representative of at least two  
518 independent experiments.

519  
520 **Flow cytometry.** Cell surface expression of wild-type and mutant SMO constructs was analyzed  
521 via flow cytometry as previously described<sup>24</sup>. Briefly, HEK293-Freestyle cells were infected with  
522 BacMam viruses encoding the indicated wild-type or mutant SMO674 constructs. 1-2 days later,  
523 live cells were stained with Alexa 647-conjugated M1 anti-FLAG antibody (1:1000, 5 minutes) and  
524 analyzed on a Cytoflex flow cytometer (Beckman Coulter).

525  
526 **CREB reporter assays.** CREB transcriptional reporter assays were performed as previously  
527 described<sup>24</sup>. Briefly, HEK293FT cells were transfected in 24-well plates with a 30:1 mixture of  
528 CRE-Firefly reporter (pGL4.29[luc2p/CRE/Hygro]) and constitutively expressing SV40-Renilla  
529 plasmids (20%(w/w)), PKA-Cα (0.625%(w/w)), along with the indicated wild-type or mutant  
530 SMO674 plasmids (24%(w/w)). A GFP expression plasmid was used to bring the total amount of  
531 DNA in each well to 250 ng. Two days later, reporter activity was measured via dual luciferase  
532 assay. Reporter activity is expressed as a ratio of Firefly/Renilla (relative luciferase units (RLU))

533 For all CREB assays, data represent mean  $\pm$  SEM from triplicate wells, and data are  
534 representative of at least two independent experiments.

535

536 **Coimmunoprecipitation assay.** SMO / PKA-C coimmunoprecipitation was performed as  
537 previously described<sup>24</sup>, with minor modifications. Briefly, 3 ml HEK293-Freestyle cells were  
538 infected with BacMam viruses encoding PKA-C $\alpha$ -YFP the indicated wild-type or mutant SMO674  
539 constructs and solubilized in low-salt solubilization buffer (20 mM HEPES pH 7.5, 150 mM NaCl,  
540 0.1 mM TCEP, 0.5% GDN, 1 mM CaCl<sub>2</sub>·6H<sub>2</sub>O, protease inhibitor tablet) to prepare a whole-cell  
541 lysate. A portion of the lysate was reserved for SDS-PAGE analysis, and the remainder was  
542 incubated with FLAG affinity resin (10  $\mu$ l settled resin per condition). After a one-hour incubation,  
543 resin was washed three times in low-salt wash buffer (20 mM HEPES pH 7.5, 150 mM NaCl, 0.1  
544 mM TCEP, 0.05% GDN, 1 mM CaCl<sub>2</sub>·6H<sub>2</sub>O), and protein eluted in 40  $\mu$ l of the same buffer  
545 supplemented with 5 mM EDTA and 0.2 mg/ml FLAG peptide. Proteins were separated by SDS-  
546 PAGE on a 4-20% Stain-Free TGX gel (BioRad), and total protein in lysate or eluate was  
547 visualized via Stain Free imaging. To detect PKA-C $\alpha$ -YFP, inputs and eluates were transferred to  
548 PVDF membranes and processed for immunoblotting with anti-GFP antibodies as previously  
549 described<sup>24</sup>. In-gel Pro-Q Diamond assay to detect phosphoprotein was performed according to  
550 the manufacturer's instructions, as previously described<sup>24</sup>.

551

552 **HEK293 imaging.** Imaging and quantification of SMO / PKA-C colocalization in HEK293 cells  
553 were performed as previously described<sup>24</sup>, with minor modifications. Briefly, HEK293 Flp-in T-rex  
554 stable cell lines coexpressing GFP-tagged PKA-C $\alpha$  with either wild-type or mutant FLAG-tagged  
555 SMO674 were plated onto  $\mu$ -slide 8-well glass chamberslides (ibidi), and treated overnight with  
556 1  $\mu$ g/ml doxycycline (to induce SMO expression) and 1  $\mu$ M SAG21k (to induce SMO activation).  
557 Live cells were subsequently stained for 5 min with an Alexa647-conjugated M1 anti-FLAG  
558 antibody (1:2000) followed by washing in HBSS, mounting, and visualization. Images were  
559 collected on a Leica SP8 laser scanning confocal microscope, using a 40x water immersion lens.  
560 All images were acquired with identical zoom / exposure / gain settings and processed identically  
561 in Fiji. SMO / PKA-C colocalization was determined by measuring the background-subtracted  
562 PKA-C (green) fluorescence at the membrane ( $\text{GFP}_{\text{membrane}} - \text{GFP}_{\text{cytoplasm}}$ ) and the background-  
563 subtracted SMO (red) fluorescence at the membrane ( $\text{Alexa647}_{\text{membrane}} - \text{Alexa647}_{\text{cytoplasm}}$ ), using  
564 four independent line-scans across the membrane in Fiji. The background-subtracted green  
565 fluorescence divided by the background-subtracted red fluorescence is referred to as "SMO /  
566 PKA-C colocalization" and reported in arbitrary units (AU).

567

568 **IMCD3 imaging.** Imaging and quantification of SMO ciliary accumulation and SMO / PKA-C  
569 colocalization in IMCD3 cells were performed as previously described<sup>24</sup>. Briefly, to assess ciliary  
570 accumulation of wild-type or mutant SMO, IMCD3 cells were transiently transfected on coverslips  
571 with the indicated myc-tagged wild-type or mutant SMO / pGEN constructs, grown to confluency,  
572 fixed, and permeabilized. Coverslips were then stained with anti-myc (SMO) and anti-Arl13b (cilia)  
573 antibodies, along with DAPI to mark the nucleus. For quantitative assessment of SMO / PKA-C  
574 colocalization in live IMCD3 cilia, cell lines coexpressing mNeonGreen-tagged PKA-C $\alpha$  with either  
575 wild-type or mutant FLAG-tagged SMO were plated onto  $\mu$ -slide 8-well glass chamberslides  
576 (ibidi), grown to confluency, and treated overnight in low-serum medium with 1  $\mu$ M SAG21k (to

577 induce SMO activation and ciliary accumulation.) A previously described cell line coexpressing  
578 mNeonGreen-tagged Nb $\beta$ 2AR80 with wild-type FLAG-tagged SMO<sup>24</sup> was used as a negative  
579 control. Live cells were subsequently stained for 5-10 min with an Alexa647-conjugated M1 anti-  
580 FLAG antibody (1:1000) and Hoechst counterstain, followed by washing in HBSS, mounting, and  
581 visualization. Cells were imaged on a Leica SP8 laser scanning confocal using a 40x water  
582 immersion lens. Three-dimensional reconstructions of Z-stacks were performed in Fiji using the  
583 3D Viewer plugin. Quantification of SMO (red) and PKA-C/Nb $\beta$ 2AR80 (green) staining was  
584 performed using CiliaQ<sup>95</sup> and reported as a ratio of the green fluorescence in each cilium,  
585 normalized to the red fluorescence (“Colocalization with SMO in cilia (AU)”), as previously  
586 described<sup>24</sup>. All images were acquired with identical zoom / exposure / gain settings.

587  
588 **GLI reporter assays.** GLI transcriptional reporter assays were performed as previously  
589 described<sup>24</sup>. Briefly, *Smo*<sup>-/-</sup> MEFs were transfected with a 30:1 mixture of 8xGli-Firefly and SV40-  
590 Renilla plasmids (50% (w/w)), along with the indicated full-length wild-type or mutant SMO  
591 constructs (in a pGEN vector, with C-terminal myc tag) (2%(w/w)), and GFP to adjust the amount  
592 of DNA to 250 ng/well. Cells were cultured to confluency, shifted to 0.5% FBS-containing medium,  
593 and treated with control or ShhN conditioned medium (1:20 dilution) for 2 days. Reporter activity  
594 was then measured via dual luciferase assay. For all GLI assays, data represent mean  $\pm$  SEM  
595 from triplicate wells, and data are representative of at least two independent experiments.

596  
597 **Zebrafish embryological studies.** Zebrafish mRNA injection, fixing, mounting, and staining of  
598 muscle cell markers were all performed as previously described<sup>24</sup>, except that a far-red secondary  
599 antibody (donkey anti-rabbit 649, Jackson Laboratory, 1:500) was used instead of a red  
600 secondary antibody during immunohistochemistry.

601  
602 **Software.** PDB files were viewed using Pymol. Graphs, curve fitting, and statistical analysis was  
603 performed in GraphPad Prism. Alignments were generated using CLUSTAL Omega. Graphics  
604 were generated using BioRender or Adobe Illustrator.

605  
606 **ACKNOWLEDGMENTS:**  
607 We thank J. Zalatan for making us aware of the parallels between SMO / PKA-C regulation in the  
608 Hh pathway and LRP / GSK-3 $\beta$  regulation in the Wnt pathway. We thank S. Lusk and K. Kwan  
609 for providing *smo*-null zebrafish (*smo*<sup>hi1640</sup>), and D. Klatt Shaw and D. Grunwald for sharing advice  
610 and reagents regarding zebrafish immunohistochemistry. We thank J. Müller and S. Kasten for  
611 excellent technical assistance. We thank the Johnson Foundation Structural Biology and  
612 Biophysics Core at the Perelman School of Medicine (Philadelphia, PA) for performing SEC-  
613 MALS analyses. We thank D. Julius, K. Basham, A. Manglik, M. He, and S. Nakielny for providing  
614 feedback on this manuscript. B.R.M. acknowledges support from the 5 for the Fight Foundation  
615 and a Cancer Center Support Grant Pilot Project Fund from the Huntsman Cancer Institute. This  
616 work was supported by the funding line Future (PhosMOrg) of University of Kassel (F.W.H.), and  
617 NIH grants R01GM100310-08 (G.V.), 1R35GM130389 (S.S.T.), 1R03TR002947 (S.S.T.) and  
618 1R35GM133672 (B.R.M.).

619  
620 **AUTHOR CONTRIBUTIONS:**

621 J.T.H. designed, executed, and interpreted CREB and GLI reporter assays. C.D.A. designed,  
622 executed, and interpreted HEK293 BRET assays. J.B. designed, executed, and interpreted  
623 fluorescence polarization studies and peptide array studies. D.B. designed, executed, and  
624 interpreted *in vitro* PKA-C activity assays and SPR studies (the latter with assistance from J.W.B.).  
625 I.B.N. developed SMO pCT purification approaches and purified this domain for *in vitro* PKA-C  
626 activity assays. C.O. designed, executed, and interpreted NMR studies. D.S.H. designed,  
627 executed, and interpreted zebrafish embryology studies. J-F.Z. designed, executed, and  
628 interpreted co-immunoprecipitation and IMCD3 BRET assays. J.L.C. designed, executed, and  
629 interpreted HEK293 confocal imaging studies. L.V. performed initial fluorescence polarization  
630 studies. C.C.K. collaborated with J.B. to develop SMO peptide arrays. V.L.R-P. provided advice  
631 and guidance on mutagenesis experiments to disrupt SMO / PKA-C interactions. S.S.T. and  
632 B.R.M. conceived the project. G.V., F.W.H., S.S.T., and B.R.M. interpreted data and provided  
633 overall project supervision. B.R.M. performed IMCD3 ciliary imaging studies and wrote the  
634 manuscript with assistance from J.T.H., C.D.A., and I.B.N.

635

636

637 **COMPETING FINANCIAL INTERESTS:**

638 The authors declare no competing financial interests.

639

640 **Correspondence and requests for materials** should be addressed to S.S.T. or B.R.M.

641



642 **FIGURES**

**a**

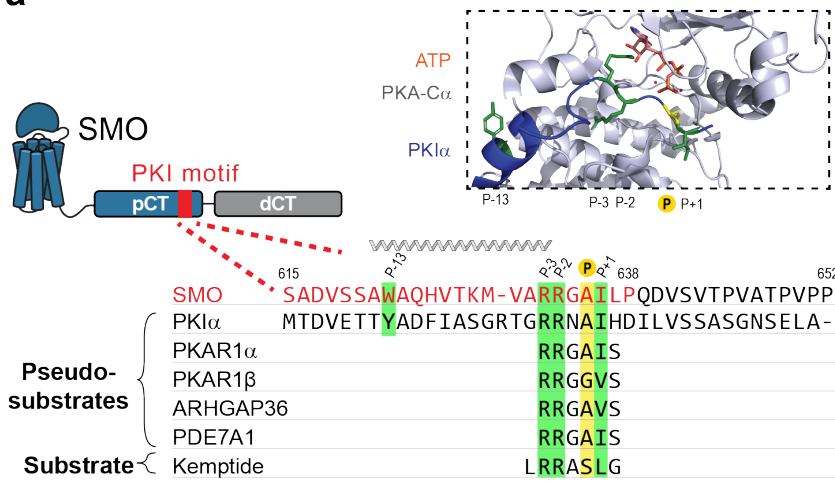

**b**

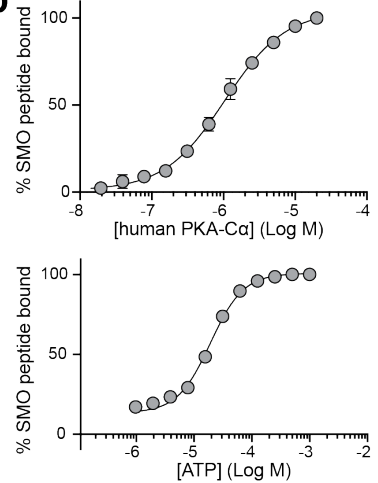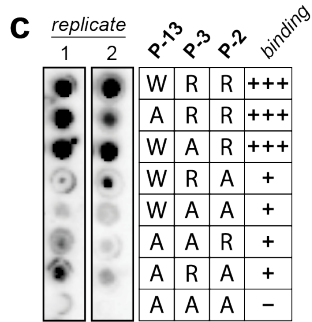

**d**

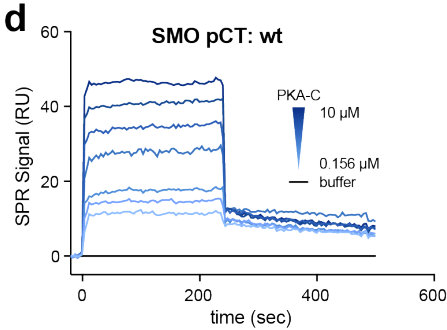

**e**

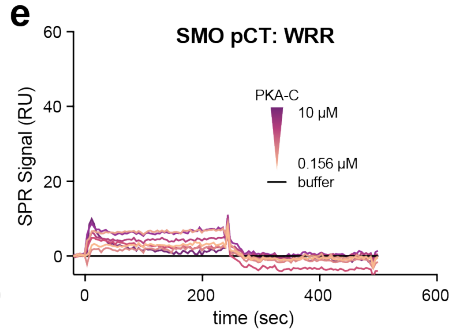

643

644

645

646

647

648

649

650

651

652

653

654

655

656

657

658

659

660

**Fig. 1: SMO binds PKA-C as a pseudosubstrate.** **a**, CLUSTAL alignment of the mouse SMO pCT with the PKIα pseudosubstrate region. Additional PKA-C pseudosubstrate and substrate sequences are provided for comparison<sup>27,96,97</sup>. P-site is yellow; other key conserved residues are green. Spiral cartoon above alignment indicates predicted SMO helical region. Standard (615-638) and extended (615-652) SMO peptides used for *in vitro* assays are colored red or black, respectively. Inset, structure of PKA-Cα bound to PKIα(5-24) (PDB: 3FJQ), with ATP colored orange and key PKI residues colored as described above. **b**, Top, fluorescence polarization assay employing FAM-labeled SMO peptide, 1 mM ATP, and varying concentrations of human PKA-Cα. Bottom, the same assay except with 3 μM PKA-Cα and varying concentrations of ATP. **c**, Overlay of purified mouse PKA-Cα onto an array of SMO peptides containing the indicated substitutions in the P-13, P-3, and P-2 positions. **d**, SPR sensorgram for binding of GST-tagged wild-type SMO pCT to a series of PKA-Cα concentrations ranging from 0.156 μM to 10 μM. Buffer contained 1 mM ATP and 10 mM MgCl<sub>2</sub>. **e**, As **d**, but with SMO pCT harboring the WRR mutation.

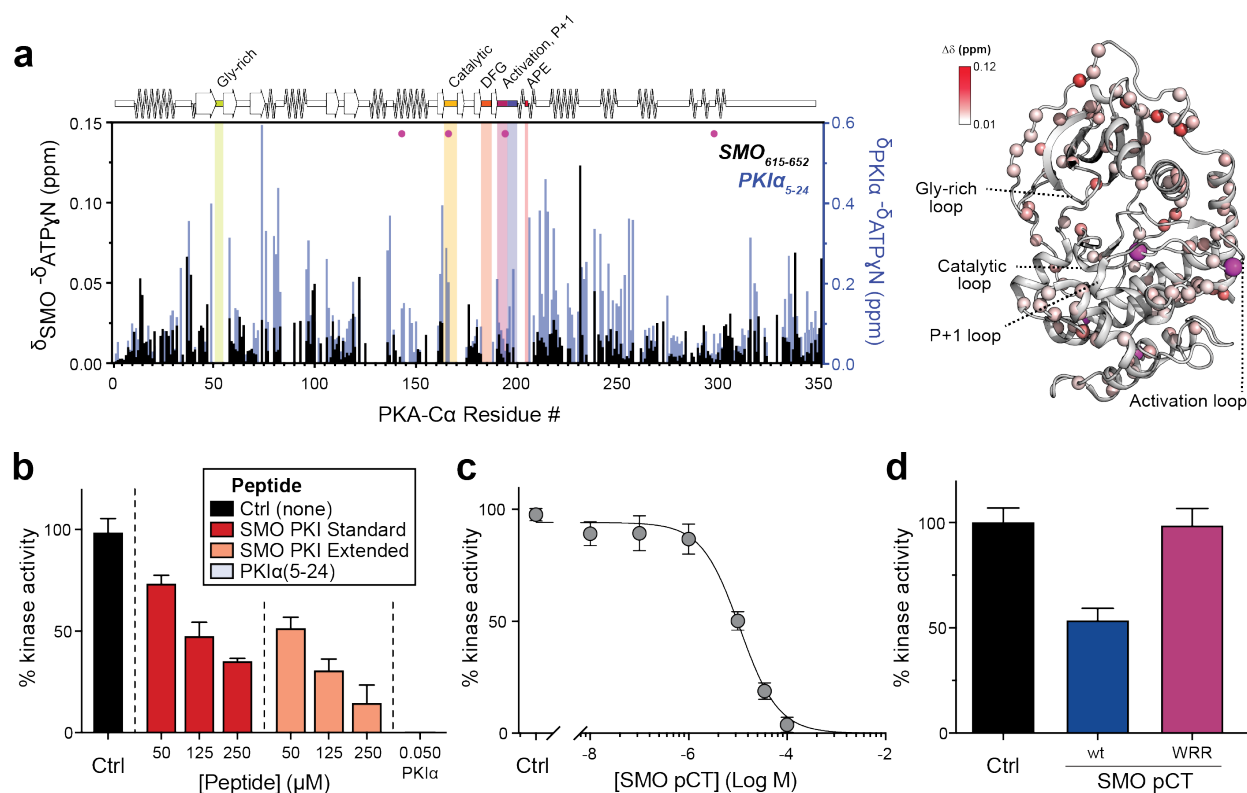

661  
 662 **Fig. 2: SMO is a pseudosubstrate inhibitor of PKA-C.** **a**, Mapping of amide backbone chemical  
 663 shift perturbations (CSP,  $\delta$ ) for  $[^1\text{H}, ^{15}\text{N}]$ -labeled PKA-Ca bound to nucleotide (ATP $\gamma$ N) and either  
 664 an extended SMO PKI peptide (black) or a control PKI $\alpha$ (5-24) peptide<sup>90</sup> (blue), calculated relative  
 665 to ATP $\gamma$ N-bound PKA-Ca without peptide. Key functional domains of PKA-C are highlighted along  
 666 the X-axis. Magenta spheres indicate PKA-Ca residues (R144, D166, R194, and F297) that show  
 667 a signal for PKI $\alpha$ (5-24) but not SMO. Right, CSP values were mapped onto the PKA-Ca structure  
 668 (PDB: 4WB5) and displayed as a heatmap. **b**, Spectrophotometric assay of PKA-Ca substrate  
 669 phosphorylation, in the presence of standard (red) or extended (coral) SMO peptides (see Fig.  
 670 1a) or a control PKI $\alpha$ (5-24) peptide (grey) **c**, Concentration dependent inhibition of PKA-Ca with  
 671 recombinant SMO pCT. **d**, As **b**, but comparing wild-type vs. WRR mutant versions of the  
 672 recombinant SMO pCT. Inhibition in **b-d** is calculated relative to a control without SMO peptide  
 673 (Ctrl.). See Extended Data Table 1 for statistical analysis.

674  
 675  
 676



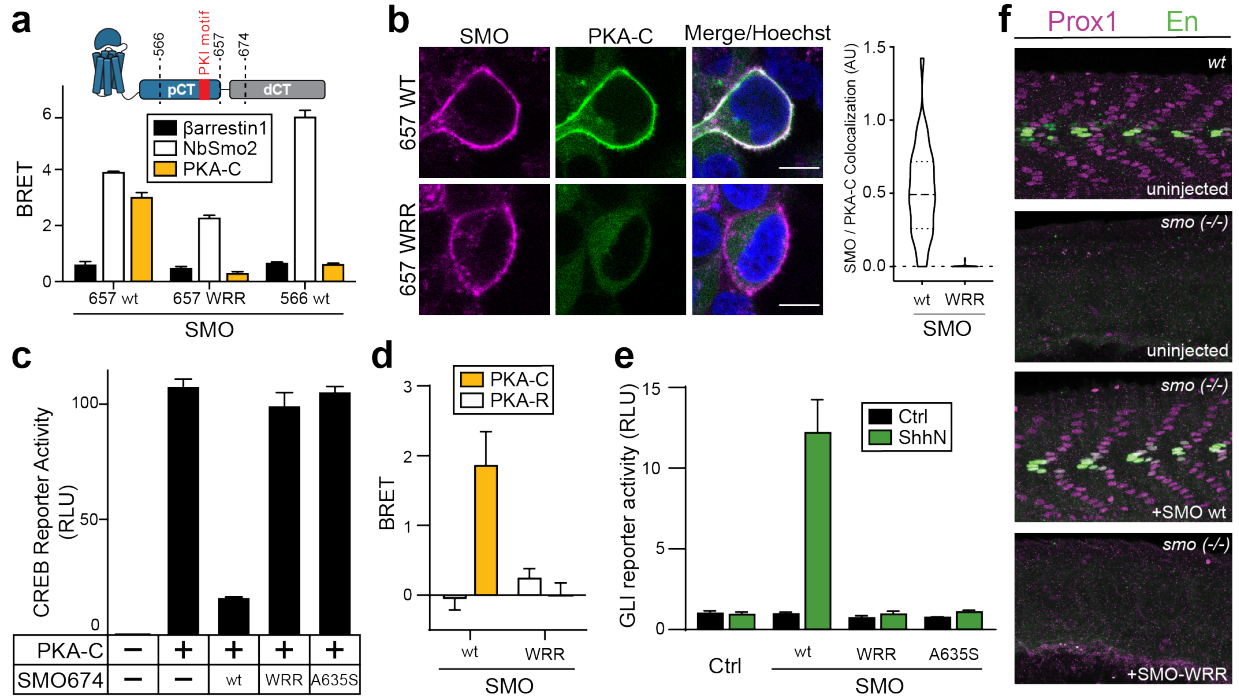

677  
 678 **Fig. 3: The SMO PKI motif is required for Hh signal transduction.** **a**, Top, schematic diagram  
 679 of truncated SMO expression constructs. Bottom, BRET analysis of SMO / PKA-C interactions in  
 680 HEK293 cells expressing nanoluc-tagged wild-type (wt) SMO657 or SMO657 harboring the WRR  
 681 mutation (WRR), along with YFP-tagged PKA-Ca. SMO566 (which lacks the C-tail) serves as a  
 682 negative control donor. YFP-tagged  $\beta$ arrestin1 (which exhibits minimal binding to SMO) and  
 683 NbSmo2 (which binds the intracellular surface of the SMO 7TM domain) serve as negative and  
 684 positive control acceptors, respectively<sup>24</sup>. **b**, Left, confocal images of live HEK293 cells  
 685 coexpressing GFP-tagged PKA-Ca with FLAG-tagged wild-type or mutant SMO674. Cells were  
 686 treated with SMO agonist (SAG21k). Scale bar = 10  $\mu$ m. Right, quantification of SMO / PKA-C  
 687 colocalization (n=34-48 cells per condition). **c**, CREB transcriptional reporter assay, reflecting  
 688 PKA-C mediated substrate phosphorylation, in HEK293 cells transfected with PKA-Ca and the  
 689 indicated SMO674 constructs. **d**, BRET analysis of SMO / PKA-C interactions in IMCD3 cells  
 690 expressing nanoluc-tagged wild-type or mutant SMO, along with low levels of PKA-Ca-YFP. PKA-  
 691 R1a-YFP serves as a negative control. Under these conditions, PKA-Ca-YFP is expressed at  
 692 substantially lower levels than PKA-R1a-YFP<sup>24</sup>. **e**, GLI transcriptional reporter assay in *Smo*<sup>-/-</sup>  
 693 MEFs transfected with a GFP negative control (Ctrl.), or the indicated wild-type (wt) or mutant  
 694 SMO constructs. Cells were treated with conditioned medium containing the N-terminal signaling  
 695 domain of Sonic hedgehog (ShhN), or control, non-ShhN-containing conditioned medium (Ctrl).  
 696 **f**, Wild-type or *smo*<sup>-/-</sup> zebrafish injected with the indicated mRNA constructs were stained for Prox1  
 697 (magenta) or Engrailed (En, green) to mark muscle fiber nuclei. n=12 (uninjected), n=41 (SMO  
 698 wt), n= 47 (SMO WRR). See Extended Data Table 1 for statistical analysis.

699  
 700

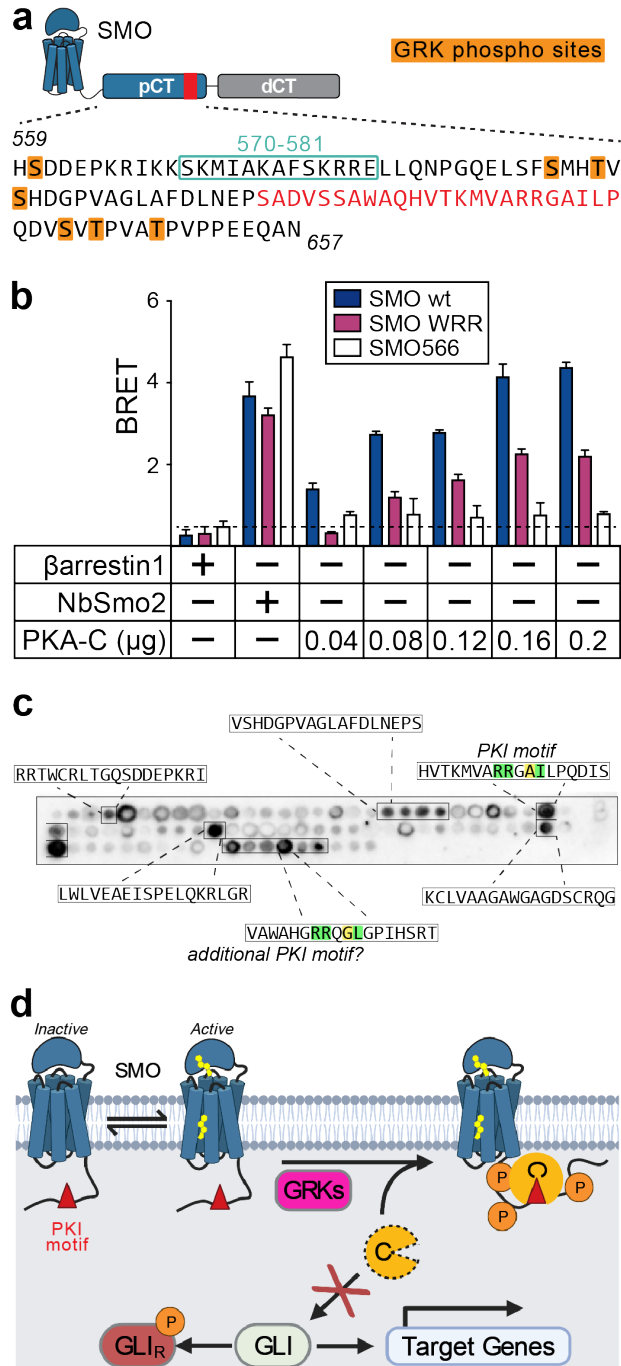

701  
702

703 **Fig. 4: An avidity-based mechanism for SMO inhibition of PKA-C.** **a**, Annotated sequence of  
 704 the mouse SMO pCT. PKI motif is indicated in red, along with GRK2/3 phosphorylation sites  
 705 (orange) and residues 570-581 (aquamarine box), previously shown to influence SMO / PKA-C  
 706 interactions and Hh signal transduction<sup>24,61</sup>. **b**, BRET analysis of SMO / PKA-C interactions in  
 707 HEK293 cells transfected with full-length wild-type SMO (wt, navy) WRR mutant (purple), or C-  
 708 terminally truncated (SMO566, white) versions of SMO as donor, and the indicated DNA amounts  
 709 of PKA-C $\alpha$  as acceptor. Nonspecific signal is indicated by the negative control BRET acceptor

710  $\beta$ arrestin1 (dashed line). See Extended Data Table 1 for statistical analysis. **c**, Representative  
711 image of a tiled array of 18mer peptides covering the complete C-tail of human SMO, probed with  
712 PKA-C $\alpha$  as in Fig. 1c. Peptides that bind are boxed and their sequences indicated. **d**, Proposed  
713 model for Hh signal transduction, as described in "Discussion".  
714

|                         |                                                              | $P_{13}$ |   | $P_{12}$ | $P_{11}$ |   |     |
|-------------------------|--------------------------------------------------------------|----------|---|----------|----------|---|-----|
| Mus_musculus            | AGLAFDLNEPS-----ADVSSAWAQHV-TKMVARRGAILPQDVS-VTPVATPVPP---EE | A        | V | R        | G        | I | 654 |
| Homo_sapiens            | AGLAFDLNEPS-----ADVSSAWAQHV-TKMVARRGAILPQDIS-VTPVATPVPP---EE | A        | V | R        | G        | I | 650 |
| Danio_rerio             | AGINFDLNEPS-----IEMSSAWAQHV-TKMVARRGAILPQDIS-VTPTGTPIPP--PEE | I        | M | S        | S        | A | 630 |
| Xenopus_laevis          | AGLNFDMEPS-----ADMSSAWAQHV-TKMVARRGAILPQDVS-VTPVATPVPP---EE  | A        | M | S        | S        | A | 623 |
| Gallus_gallus           | AGLAFDINEPS-----ADVSSAWAQHV-TKMVARRGAILPQDVS-VTPVATPVPP---EE | A        | V | R        | G        | I | 517 |
| Drosophila_melanogaster | VGLNFDVNDLNS-SETNDISSTWAAYL-PQCVKRRMALTGAATGNSSSH-GPRKNSLDSE | W        | A | A        | Y        | L | 671 |
| Ciona_intestinalis      | LGMNFDLHVS-----QEMSSWVRNV-PNMVKRRGGMLPMEQPHDNVE-----         | Q        | E | M        | S        | S | 611 |
| Lytechinus_variegatus   | IGMKLDLPPSSVVGDDPTSSSSWGNVVRMLARRGAAYPPIATLGNSPRATPDSS--DSG  | S        | S | S        | S        | W | 641 |
| Petromyzon_marinus      | VGMDLNLDDSG-----S-DSSSWINHV-TKMVARRGAILP-----                | S        | D | S        | S        | W | 581 |
| Novocrania_anomala      | LGMKFDLNSVT----SQDMSSAWMEAV-PRLVRRRGGMIHPTAGTLRRYSDS-----DI  | S        | Q | D        | M        | S | 621 |

715  
 716 **Extended Data Fig.1: Sequence alignment of SMO PKI motif.** Extended alignment of a portion  
 717 of the pCT from the indicated SMO orthologs, with key PKI motif residues colored as in Fig. 1a.  
 718

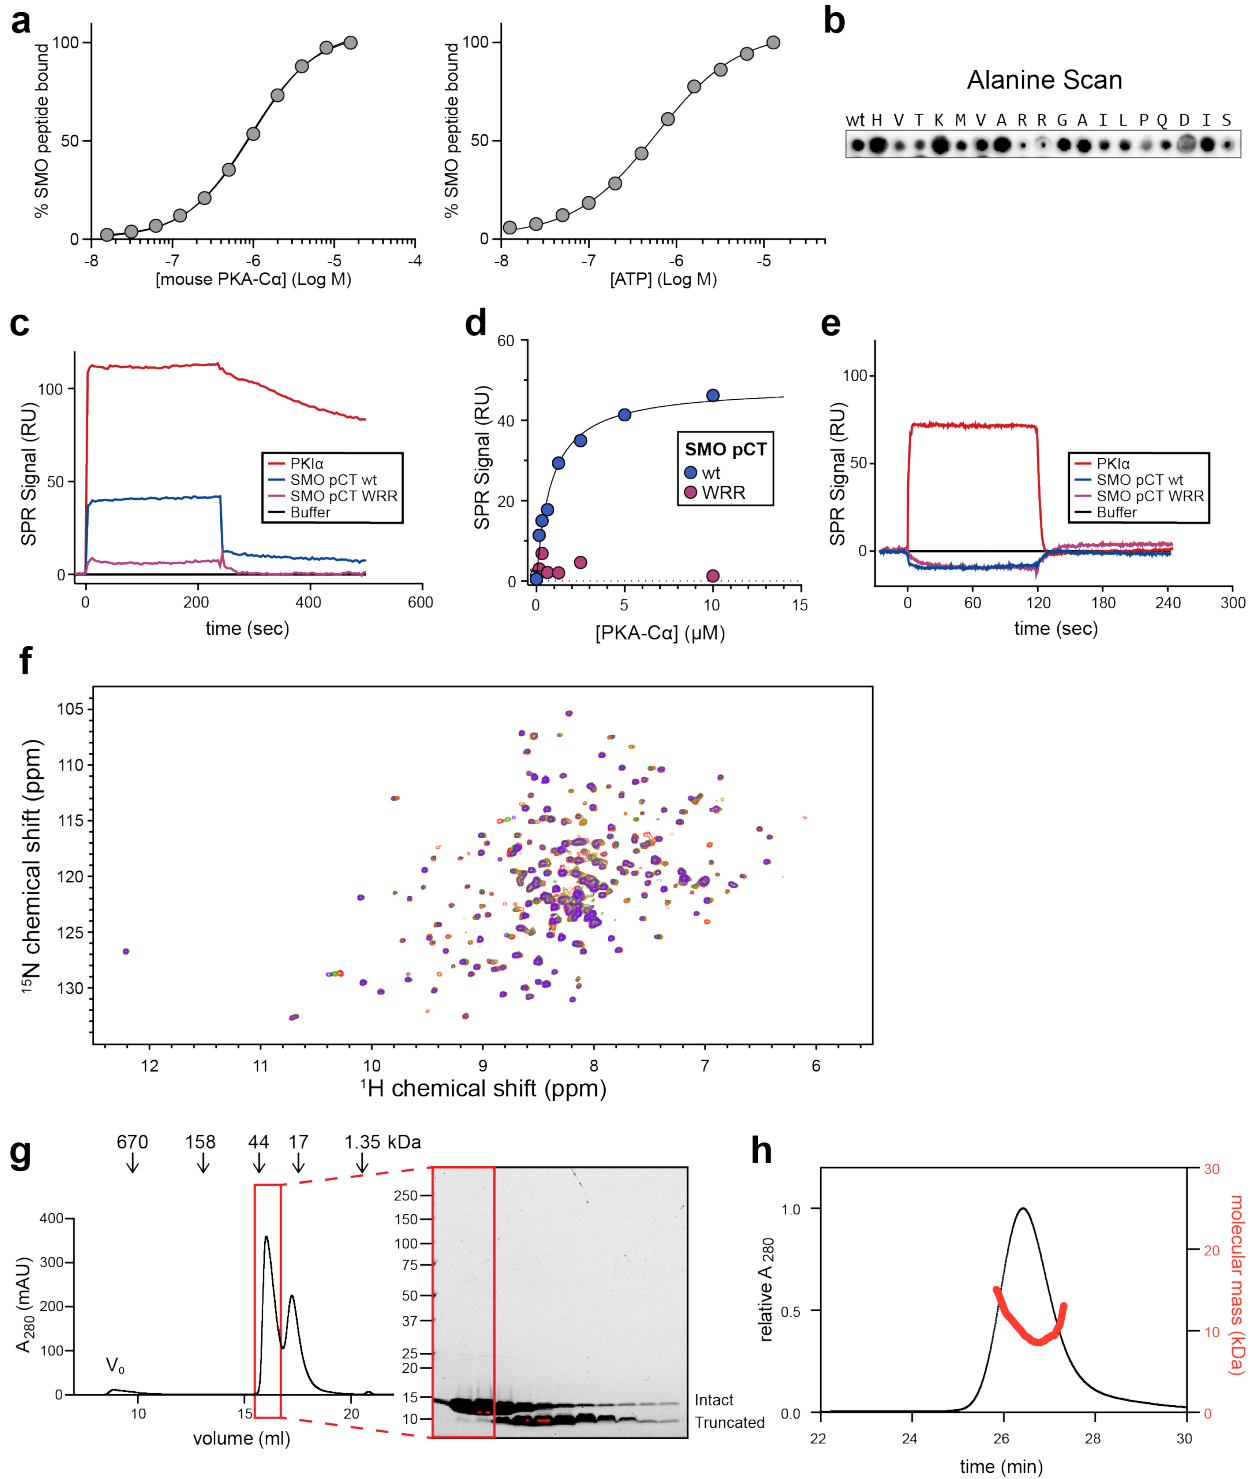

719  
720  
721  
722  
723  
724  
725

**Extended Data Fig. 2: Further binding and peptide array studies, SPR sensorgrams, NMR spectra, and SMO pCT purification strategy.** **a**, Fluorescence polarization assays using mouse PKA-C $\alpha$ , performed as in Fig. 1b. **b**, Peptide array, performed as in Fig. 1c, but with individual residues in the human SMO PKI motif mutated to alanine. **c**, SPR sensorgram for 5  $\mu$ M PKA-C $\alpha$  binding to GST-tagged wild-type (blue) or WRR mutant (purple) SMO pCT, or a PKI $\alpha$  positive control (red), in the presence of ATP and MgCl $_2$ . **d**, Steady-state analysis of binding interactions

726 between human PKA-C $\alpha$  and a recombinant wild-type (wt, blue) or mutant (WRR, magenta) SMO  
727 pCT, as assessed by SPR. **e**, SPR sensorgram, performed as in **c**, but with ATP and MgCl<sub>2</sub>  
728 omitted from the buffer. PKA-C $\alpha$  was present at 2.5  $\mu$ M. Note that although removal of ATP and  
729 MgCl<sub>2</sub> does not completely eliminate steady-state binding to the PKI $\alpha$  positive control, it  
730 dramatically accelerates the dissociation rate, as expected. **f**, [<sup>1</sup>H, <sup>15</sup>N] heteronuclear single  
731 quantum coherence (HSQC) spectra used to calculate CSP values. Spectra were acquired from  
732 PKA-C $\alpha$  / ATP $\gamma$ N complexed with a SMO peptide at 1:0 (red), 1:1 (yellow), 1:2 (green), or 1:4  
733 (purple) molar ratios. CSP values were calculated from the spectrum corresponding to a 1:4 molar  
734 ratio and plotted in Fig. 2a. **g**, Purification of SMO pCT domain from *E. coli*. Following size  
735 exclusion chromatography (left), the purified protein was analyzed by SDS-PAGE (right). The  
736 SMO pCT elutes as two peaks, the earlier of which is the intact pCT and the later of which  
737 corresponds to a truncated fragment (data not shown). Fractions containing the intact pCT (red  
738 box) were pooled and used for subsequent experiments. **h**, Multi-angle light scattering coupled  
739 with size exclusion chromatography (SEC-MALS) was used to determine the protein oligomeric  
740 state for the pooled fractions indicated in **g**. The average molecular mass was calculated as M<sub>w</sub>  
741 = 11.25 +/- 2.1 kDa, close to the predicted molecular mass for a monomer (10.1 kDa).  
742

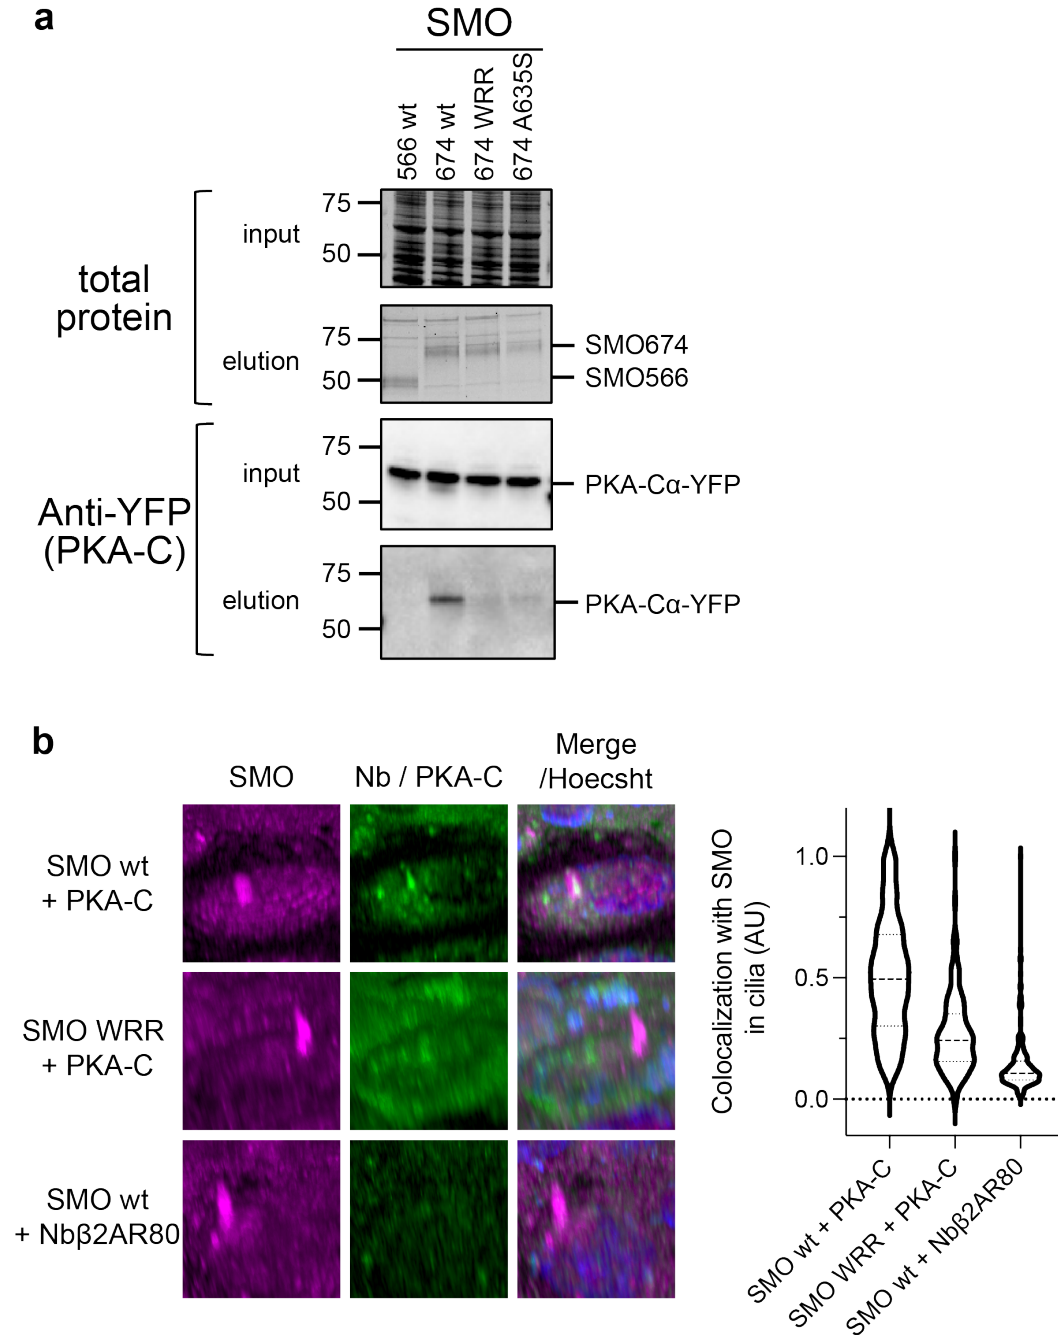

743  
744  
745  
746  
747  
748  
749  
750  
751

**Extended Data Fig. 3: Coimmunoprecipitation studies and ciliary colocalization studies to assess SMO / PKA-C interactions.** **a**, Coimmunoprecipitation of PKA-C $\alpha$ -YFP with the indicated FLAG-tagged wild-type or mutant SMO constructs was assessed using FLAG chromatography from lysates of transfected HEK293 cells. **b**, Left, Colocalization of FLAG-tagged wild-type or mutant SMO674 (magenta) with mNeonGreen-tagged PKA-C $\alpha$  (green) in ciliated IMCD3 cells stably expressing both constructs and treated with a SMO agonist, SAG21k, to induce SMO ciliary localization. Cilia are marked by the SMO stain. mNeonGreen-tagged Nb $\beta$ 2AR80 (which does not bind SMO<sup>24</sup>) serves as a negative control. 3D reconstructions from Z-stacks of confocal live-



752 cell images are shown. Right, quantification of microscopy studies (n=142-244 cilia per condition).  
753 See Extended Data Table 1 for statistical analysis.  
754

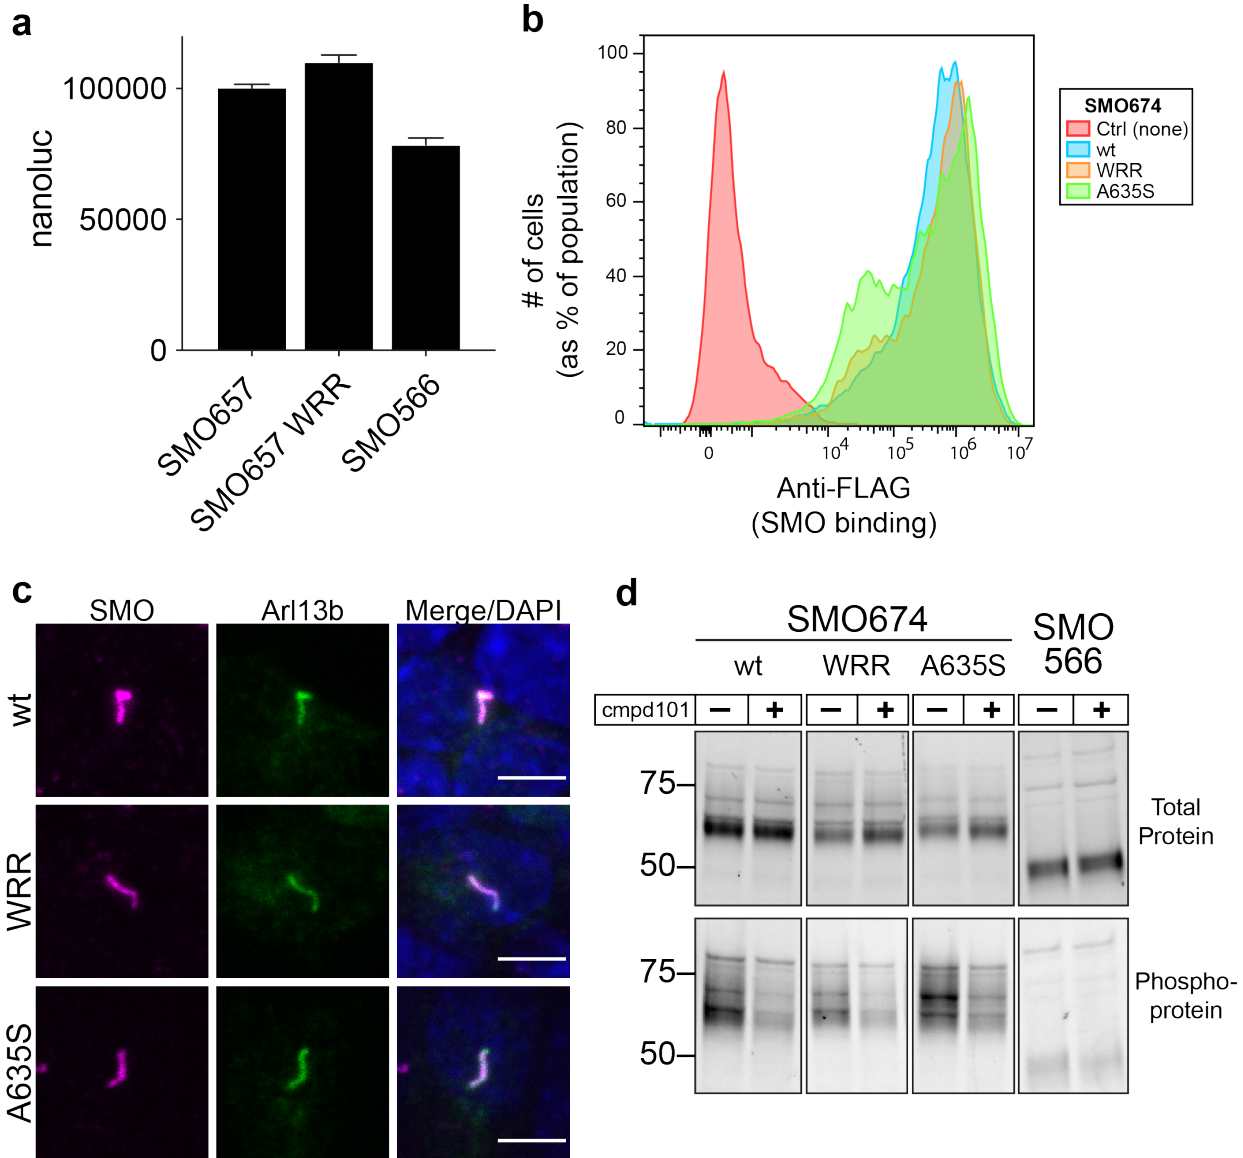

755  
756

**Extended Data Fig. 4: Controls for SMO / PKA-C binding, colocalization, and signaling studies.** **a**, Expression levels of SMO constructs in Fig. 3a, assessed by whole-cell nanoluc measurements. **b**, Surface levels of N-terminally FLAG-tagged wild-type or mutant SMO674 constructs were quantified via expression in HEK293 cells followed by FLAG staining and flow cytometry. Mock-infected cells stained with FLAG antibody (red) serve as a negative control. **c**, Ciliary localization in IMCD3 cells of myc-tagged wild-type or mutant SMO proteins (magenta). Cilia were visualized with Arl13b antibody (green). Scale bar = 5  $\mu$ m. **d**, GRK2/3-dependent phosphorylation of FLAG-tagged wild-type or mutant SMO674 constructs was determined via expression in HEK293 cells treated with or without the GRK2/3 inhibitor cmpd101, followed by FLAG purification. Levels of total and phosphorylated SMO were assessed by Stain Free imaging and ProQ Diamond fluorescence, respectively. SMO566, which is not phosphorylated by GRK2/3 (as it does not contain the C-tail and therefore lacks all previously mapped physiological GRK2/3 phosphorylation sites<sup>24</sup>), serves as a negative control.

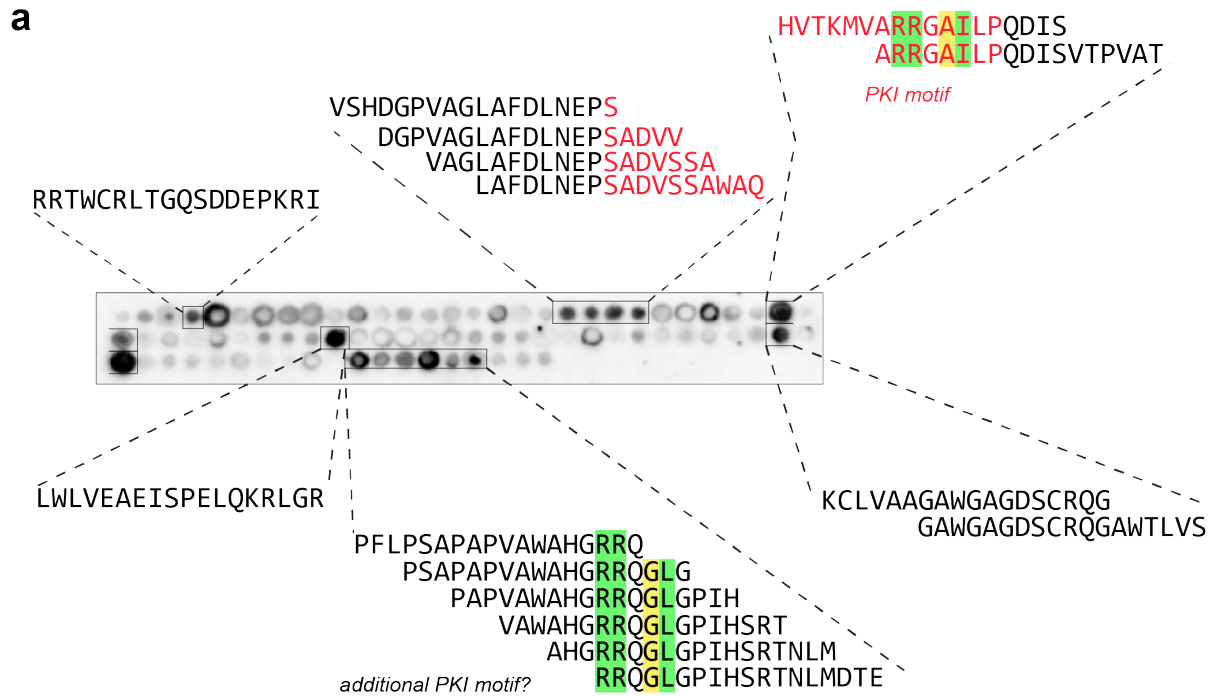

**b** Human SMO C-tail

<sup>535</sup> WTKATLLIWRRTWCRLTGQSDDEPKRIKSKMIAKAFSKRHELLQNPGQELSFMSM  
 HTVSHDGPVAGLAFDLNEPSADVSSAWAQHVTKMVARRGAILPQDISVTPVATPVPPE  
 EQANLWLVEAEISPELQKRLGRKKRRKRKKEVCPLAPPPPELHPPAPAPSTIPRLPQL  
 PRQKCLVAAGAWGAGDSCRQGAWTLVSNPFCPEPSPQDPFLPSAPAPVAWAHRRQGLG  
 GPIHSRTNLMDELMADSSDF <sup>786</sup>

770  
 771  
 772  
 773  
 774  
 775  
 776  
 777  
 778  
 779  
 780

**Extended Data Fig. 5: Complete data set from SMO C-tail peptide array studies.** **a**, The same SMO tiled peptide array from Fig. 4c, but including the sequences of all positive hits in each array cluster. **b**, Complete human SMO C-tail sequence used to create the peptide array. In **a,b**, the SMO PKI motif identified in the pCT is indicated in red. Key residues in this PKI motif, along with ones in the candidate PKI motif in the dCT, are colored as in Fig. 1a.

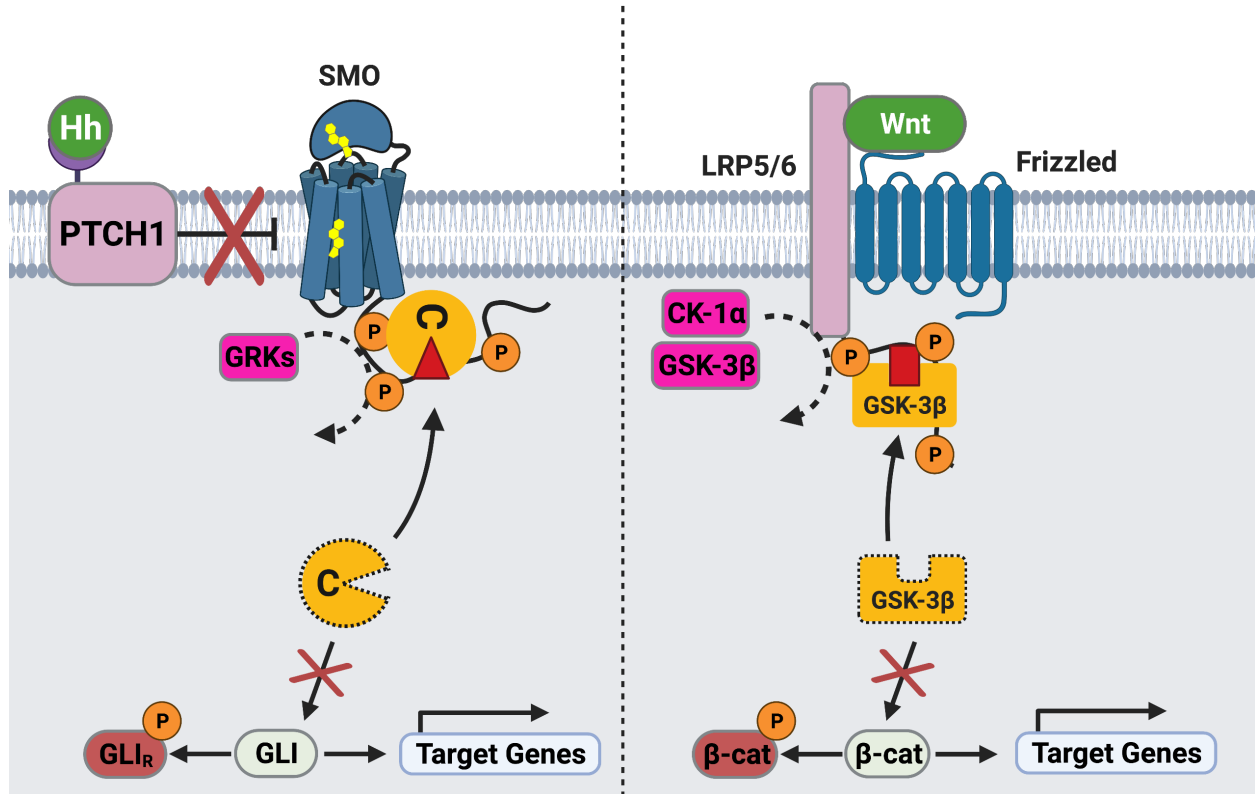

781  
782

783 **Extended Data Fig. 6: Similarity between signal transduction mechanisms in the Hh and**  
784 **Wnt pathways.** Schematic diagram of transmembrane signal transduction in the Hh (left) and  
785 Wnt (right) pathways. During Hh signal transduction, active SMO is phosphorylated on its  
786 cytoplasmic tail by GRK2/3, triggering membrane sequestration and inhibition of PKA-C, and  
787 ultimately stabilization and activation of GLI. During Wnt signal transduction, active LRP5/6 is  
788 phosphorylated on its cytoplasmic tail by glycogen synthase kinase (GSK)-3β and casein kinase  
789 (CK)-1α, triggering membrane sequestration and inhibition of GSK-3β, and ultimately stabilization  
790 and activation of β-catenin<sup>74-77</sup>. Note that this is a simplified and highly schematized diagram and  
791 is not intended to be comprehensive; many other components of both pathways (for example, the  
792 destruction complex in which GSK-3β and β-catenin reside) are omitted in order to highlight  
793 mechanistic similarities between the underlying transmembrane signaling mechanisms.

794  
795  
796

797 **Extended Data Table 1.** Tests of statistical significance for all figures.

| Figure | Condition 1                   | Condition 2                   | Significant? | p-value              |
|--------|-------------------------------|-------------------------------|--------------|----------------------|
| 2b     | multiple comparison           | multiple comparison           | yes          | <0.001 <sup>a</sup>  |
| 2d     | None                          | wt                            | yes          | <0.0001 <sup>b</sup> |
| 2d     | WRR                           | wt                            | yes          | <0.0001 <sup>b</sup> |
| 2d     | None                          | WRR                           | no           | n.s. <sup>b</sup>    |
| 3a     | SMO657 wt: $\beta$ arrestin1  | SMO657 wt: NbSmo2             | yes          | 0.00053              |
| 3a     | SMO657 wt: $\beta$ arrestin1  | SMO657 wt: PKA-C              | yes          | 0.00438              |
| 3a     | SMO657 wt: PKA-C              | SMO657 WRR: PKA-C             | yes          | 0.001553             |
| 3a     | SMO657 wt: PKA-C              | SMO566 wt: PKA-C              | yes          | 0.003181             |
| 3a     | SMO657 WRR: $\beta$ arrestin1 | SMO657 WRR: PKA-C             | no           | 0.051139             |
| 3a     | SMO657 WRR: $\beta$ arrestin1 | SMO657 WRR: NbSmo2            | yes          | 0.000165             |
| 3a     | SMO566 wt: $\beta$ arrestin1  | SMO566 wt: PKA-C              | no           | 0.22268              |
| 3a     | SMO566 wt: $\beta$ arrestin1  | SMO566 wt: NbSmo2             | yes          | 0.00162              |
| 3b     | SMO674: wt                    | SMO674: WRR                   | yes          | <0.0001              |
| 3c     | None                          | PKA-C                         | yes          | 0.000723             |
| 3c     | PKA-C                         | PKA-C + SMO674 wt             | yes          | 0.000995             |
| 3c     | PKA-C                         | PKA-C + SMO674 WRR            | no           | 0.267104             |
| 3c     | PKA-C                         | PKA-C + SMO674 A635S          | no           | 0.544481             |
| 3c     | PKA-C + SMO674 wt             | PKA-C + SMO674 WRR            | yes          | 0.004314             |
| 3c     | PKA-C + SMO674 wt             | PKA-C + SMO674 A635S          | yes          | 0.000513             |
| 3d     | SMO wt: PKA-R                 | SMO wt: PKA-C                 | yes          | 0.012831             |
| 3d     | SMO wt: PKA-C                 | SMO WRR: PKA-C                | yes          | 0.01315              |
| 3d     | SMO WRR: PKA-R                | SMO WRR: PKA-C                | no           | 0.113776             |
| 3e     | Ctrl.: Ctrl                   | Neg.: ShhN                    | no           | 0.63116              |
| 3e     | SMO wt: Ctrl                  | SMO wt: ShhN                  | yes          | 0.010704             |
| 3e     | SMO wt: ShhN                  | SMO WRR: ShhN                 | yes          | 0.010346             |
| 3e     | SMO wt: ShhN                  | SMO A635S: ShhN               | yes          | 0.010945             |
| 4b     | $\beta$ arrestin1: SMO WRR    | PKA-C (0.04 $\mu$ g): SMO WRR | no           | 0.885586             |
| 4b     | $\beta$ arrestin1: SMO WRR    | PKA-C (0.08 $\mu$ g): SMO WRR | yes          | 0.001529             |
| 4b     | $\beta$ arrestin1: SMO WRR    | PKA-C (0.12 $\mu$ g): SMO WRR | yes          | 0.000368             |
| 4b     | $\beta$ arrestin1: SMO WRR    | PKA-C (0.16 $\mu$ g): SMO WRR | yes          | 0.000109             |
| 4b     | $\beta$ arrestin1: SMO WRR    | PKA-C (0.20 $\mu$ g): SMO WRR | yes          | 0.000085             |

|       |                         |                          |     |          |
|-------|-------------------------|--------------------------|-----|----------|
| 4b    | PKA-C (0.04 µg): SMO wt | PKA-C (0.04 µg): SMO WRR | yes | 0.004444 |
| 4b    | PKA-C (0.08 µg): SMO wt | PKA-C (0.08 µg): SMO WRR | yes | 0.000502 |
| 4b    | PKA-C (0.12 µg): SMO wt | PKA-C (0.12 µg): SMO WRR | yes | 0.001341 |
| 4b    | PKA-C (0.16 µg): SMO wt | PKA-C (0.16 µg): SMO WRR | yes | 0.004344 |
| 4b    | PKA-C (0.20 µg): SMO wt | PKA-C (0.20 µg): SMO WRR | yes | 0.000029 |
| 4b    | PKA-C (0.04 µg): SMO566 | PKA-C (0.04 µg): SMO WRR | yes | 0.00368  |
| 4b    | PKA-C (0.08 µg): SMO566 | PKA-C (0.08 µg): SMO WRR | no  | 0.180776 |
| 4b    | PKA-C (0.12 µg): SMO566 | PKA-C (0.12 µg): SMO WRR | yes | 0.014786 |
| 4b    | PKA-C (0.16 µg): SMO566 | PKA-C (0.16 µg): SMO WRR | yes | 0.006063 |
| 4b    | PKA-C (0.20 µg): SMO566 | PKA-C (0.20 µg): SMO WRR | yes | 0.001566 |
| ED 3b | SMO wt + PKA-C          | SMO WRR + PKA-C          | yes | <0.0001  |
| ED 4a | SMO657                  | SMO657 WRR               | no  | 0.057394 |

798

799

800 <sup>a</sup> To check for significant differences between PKA-C lacking peptide (control) and each peptide  
 801 concentration a one-way ANOVA with Tukey's multiple comparison was performed. All  
 802 comparisons show  $p \leq 0.0001$  (\*\*\*\*) significance except the comparison between 125µM standard  
 803 vs extended peptide ( $p \leq 0.001$ , \*\*\*).

804

805 <sup>b</sup> To check for significant differences between PKA lacking peptide (control) and the indicated  
 806 recombinant pCT fragment a one-way ANOVA with Tukey's multiple comparison was performed  
 807 (\*\*\*\*  $\triangleq p \leq 0.0001$ , ns  $\triangleq$  not significant).

808

809 **Extended Data Table 2** Quantification of phenotypes for zebrafish embryogenesis studies. The  
810 # and % of animals exhibiting U-shaped somites (indicative of a failure in Hh signaling during  
811 somitogenesis<sup>55,98-100</sup>) are indicated. Note that in both the WRR and A635S mutant conditions,  
812 close to 25% of animals exhibited U-shaped somites, consistent with the Mendelian inheritance  
813 of a null *smo* allele from the initial heterozygous incross.  
814

| mRNA injected | # Animals from <i>smo</i> (+/-) incross | # Animals with U-shaped somites | % Animals with U-shaped somites |
|---------------|-----------------------------------------|---------------------------------|---------------------------------|
| SMO wt        | 154                                     | 2                               | 1.3%                            |
| SMO WRR       | 226                                     | 61                              | 27.0%                           |
| SMO A635S     | 70                                      | 19                              | 27.1%                           |

815

816



817 **REFERENCES:**

818

- 819 1 Briscoe, J. & Therond, P. P. The mechanisms of Hedgehog signalling and its roles in  
820 development and disease. *Nat Rev Mol Cell Biol* **14**, 416-429, doi:10.1038/nrm3598  
821 (2013).
- 822 2 Ingham, P. W. & McMahon, A. P. Hedgehog signaling in animal development:  
823 paradigms and principles. *Genes Dev* **15**, 3059-3087, doi:10.1101/gad.938601 (2001).
- 824 3 Ingham, P. W., Nakano, Y. & Seger, C. Mechanisms and functions of Hedgehog  
825 signalling across the metazoa. *Nat Rev Genet* **12**, 393-406, doi:10.1038/nrg2984 (2011).
- 826 4 Kong, J. H., Siebold, C. & Rohatgi, R. Biochemical mechanisms of vertebrate hedgehog  
827 signaling. *Development* **146**, doi:10.1242/dev.166892 (2019).
- 828 5 Muenke, M. & Beachy, P. A. Genetics of ventral forebrain development and  
829 holoprosencephaly. *Curr Opin Genet Dev* **10**, 262-269, doi:10.1016/s0959-  
830 437x(00)00084-8 (2000).
- 831 6 Digilio, M. C. *et al.* Atrioventricular canal defect and genetic syndromes: The unifying  
832 role of sonic hedgehog. *Clin Genet* **95**, 268-276, doi:10.1111/cge.13375 (2019).
- 833 7 Anderson, E., Peluso, S., Lettice, L. A. & Hill, R. E. Human limb abnormalities caused by  
834 disruption of hedgehog signaling. *Trends Genet* **28**, 364-373,  
835 doi:10.1016/j.tig.2012.03.012 (2012).
- 836 8 Pak, E. & Segal, R. A. Hedgehog Signal Transduction: Key Players, Oncogenic Drivers,  
837 and Cancer Therapy. *Dev Cell* **38**, 333-344, doi:10.1016/j.devcel.2016.07.026 (2016).
- 838 9 Wu, F., Zhang, Y., Sun, B., McMahon, A. P. & Wang, Y. Hedgehog Signaling: From  
839 Basic Biology to Cancer Therapy. *Cell Chem Biol* **24**, 252-280,  
840 doi:10.1016/j.chembiol.2017.02.010 (2017).
- 841 10 Hui, C. C. & Angers, S. Gli proteins in development and disease. *Annu Rev Cell Dev Biol*  
842 **27**, 513-537, doi:10.1146/annurev-cellbio-092910-154048 (2011).
- 843 11 Deshpande, I. *et al.* Smoothened stimulation by membrane sterols drives Hedgehog  
844 pathway activity. *Nature* **571**, 284-288, doi:10.1038/s41586-019-1355-4 (2019).
- 845 12 Huang, P. *et al.* Structural Basis of Smoothened Activation in Hedgehog Signaling. *Cell*  
846 **174**, 312-324 e316, doi:10.1016/j.cell.2018.04.029 (2018).
- 847 13 Byrne, E. F. X. *et al.* Structural basis of Smoothened regulation by its extracellular  
848 domains. *Nature* **535**, 517-522, doi:10.1038/nature18934 (2016).
- 849 14 Qi, X., Friedberg, L., De Bose-Boyd, R., Long, T. & Li, X. Sterols in an intramolecular  
850 channel of Smoothened mediate Hedgehog signaling. *Nat Chem Biol* **16**, 1368-1375,  
851 doi:10.1038/s41589-020-0646-2 (2020).
- 852 15 Wang, B., Fallon, J. F. & Beachy, P. A. Hedgehog-regulated processing of Gli3 produces  
853 an anterior/posterior repressor gradient in the developing vertebrate limb. *Cell* **100**, 423-  
854 434, doi:10.1016/s0092-8674(00)80678-9 (2000).
- 855 16 Humke, E. W., Dorn, K. V., Milenkovic, L., Scott, M. P. & Rohatgi, R. The output of  
856 Hedgehog signaling is controlled by the dynamic association between Suppressor of  
857 Fused and the Gli proteins. *Genes Dev* **24**, 670-682, doi:10.1101/gad.1902910 (2010).
- 858 17 Niewiadomski, P. *et al.* Gli protein activity is controlled by multisite phosphorylation in  
859 vertebrate Hedgehog signaling. *Cell Rep* **6**, 168-181, doi:10.1016/j.celrep.2013.12.003  
860 (2014).
- 861 18 Li, J. *et al.* PKA-mediated Gli2 and Gli3 phosphorylation is inhibited by Hedgehog  
862 signaling in cilia and reduced in Talpid3 mutant. *Dev Biol* **429**, 147-157,  
863 doi:10.1016/j.ydbio.2017.06.035 (2017).
- 864 19 Nachury, M. V. & Mick, D. U. Establishing and regulating the composition of cilia for  
865 signal transduction. *Nat Rev Mol Cell Biol* **20**, 389-405, doi:10.1038/s41580-019-0116-4  
866 (2019).

- 867 20 Reiter, J. F. & Leroux, M. R. Genes and molecular pathways underpinning ciliopathies.  
868 *Nat Rev Mol Cell Biol* **18**, 533-547, doi:10.1038/nrm.2017.60 (2017).
- 869 21 Gigante, E. D. & Caspary, T. Signaling in the primary cilium through the lens of the  
870 Hedgehog pathway. *Wiley Interdiscip Rev Dev Biol* **9**, e377, doi:10.1002/wdev.377  
871 (2020).
- 872 22 Lefkowitz, R. J. The superfamily of heptahelical receptors. *Nat Cell Biol* **2**, E133-136,  
873 doi:10.1038/35017152 (2000).
- 874 23 Pierce, K. L., Premont, R. T. & Lefkowitz, R. J. Seven-transmembrane receptors. *Nat*  
875 *Rev Mol Cell Biol* **3**, 639-650, doi:10.1038/nrm908 (2002).
- 876 24 Arveseth, C. D. *et al.* Smoothed transduces hedgehog signals via activity-dependent  
877 sequestration of PKA catalytic subunits. *PLoS Biol* **19**, e3001191,  
878 doi:10.1371/journal.pbio.3001191 (2021).
- 879 25 Taylor, S. S., Ilouz, R., Zhang, P. & Kornev, A. P. Assembly of allosteric macromolecular  
880 switches: lessons from PKA. *Nat Rev Mol Cell Biol* **13**, 646-658, doi:10.1038/nrm3432  
881 (2012).
- 882 26 Dalton, G. D. & Dewey, W. L. Protein kinase inhibitor peptide (PKI): a family of  
883 endogenous neuropeptides that modulate neuronal cAMP-dependent protein kinase  
884 function. *Neuropeptides* **40**, 23-34, doi:10.1016/j.npep.2005.10.002 (2006).
- 885 27 Soberg, K. & Skalhegg, B. S. The Molecular Basis for Specificity at the Level of the  
886 Protein Kinase a Catalytic Subunit. *Front Endocrinol (Lausanne)* **9**, 538,  
887 doi:10.3389/fendo.2018.00538 (2018).
- 888 28 Taylor, S. S., Zhang, P., Steichen, J. M., Keshwani, M. M. & Kornev, A. P. PKA: lessons  
889 learned after twenty years. *Biochim Biophys Acta* **1834**, 1271-1278,  
890 doi:10.1016/j.bbapap.2013.03.007 (2013).
- 891 29 Kemp, B. E. & Pearson, R. B. Protein kinase recognition sequence motifs. *Trends*  
892 *Biochem Sci* **15**, 342-346, doi:10.1016/0968-0004(90)90073-k (1990).
- 893 30 Scott, J. D., Fischer, E. H., Demaille, J. G. & Krebs, E. G. Identification of an inhibitory  
894 region of the heat-stable protein inhibitor of the cAMP-dependent protein kinase. *Proc*  
895 *Natl Acad Sci U S A* **82**, 4379-4383, doi:10.1073/pnas.82.13.4379 (1985).
- 896 31 Cheng, H. C., van Patten, S. M., Smith, A. J. & Walsh, D. A. An active twenty-amino-  
897 acid-residue peptide derived from the inhibitor protein of the cyclic AMP-dependent  
898 protein kinase. *Biochem J* **231**, 655-661, doi:10.1042/bj2310655 (1985).
- 899 32 Corbin, J. D. *et al.* Studies on the properties and mode of action of the purified regulatory  
900 subunit of bovine heart adenosine 3':5'-monophosphate-dependent protein kinase. *J Biol*  
901 *Chem* **253**, 3997-4003 (1978).
- 902 33 Scott, J. D., Glaccum, M. B., Fischer, E. H. & Krebs, E. G. Primary-structure  
903 requirements for inhibition by the heat-stable inhibitor of the cAMP-dependent protein  
904 kinase. *Proc Natl Acad Sci U S A* **83**, 1613-1616, doi:10.1073/pnas.83.6.1613 (1986).
- 905 34 Glass, D. B., Cheng, H. C., Mende-Mueller, L., Reed, J. & Walsh, D. A. Primary  
906 structural determinants essential for potent inhibition of cAMP-dependent protein kinase  
907 by inhibitory peptides corresponding to the active portion of the heat-stable inhibitor  
908 protein. *J Biol Chem* **264**, 8802-8810 (1989).
- 909 35 Knighton, D. R. *et al.* Structure of a peptide inhibitor bound to the catalytic subunit of  
910 cyclic adenosine monophosphate-dependent protein kinase. *Science* **253**, 414-420,  
911 doi:10.1126/science.1862343 (1991).
- 912 36 Knighton, D. R. *et al.* Crystal structure of the catalytic subunit of cyclic adenosine  
913 monophosphate-dependent protein kinase. *Science* **253**, 407-414,  
914 doi:10.1126/science.1862342 (1991).
- 915 37 Johnson, D. A., Akamine, P., Radzio-Andzelm, E., Madhusudan, M. & Taylor, S. S.  
916 Dynamics of cAMP-dependent protein kinase. *Chem Rev* **101**, 2243-2270,  
917 doi:10.1021/cr000226k (2001).

- 918 38 Olivieri, C. *et al.* Multi-state recognition pathway of the intrinsically disordered protein  
919 kinase inhibitor by protein kinase A. *Elife* **9**, doi:10.7554/eLife.55607 (2020).
- 920 39 Kim, J. *et al.* The role of ciliary trafficking in Hedgehog receptor signaling. *Sci Signal* **8**,  
921 ra55, doi:10.1126/scisignal.aaa5622 (2015).
- 922 40 Whitehouse, S. & Walsh, D. A. Mg X ATP2-dependent interaction of the inhibitor protein  
923 of the cAMP-dependent protein kinase with the catalytic subunit. *J Biol Chem* **258**, 3682-  
924 3692 (1983).
- 925 41 Knape, M. J. *et al.* Divalent metal ions control activity and inhibition of protein kinases.  
926 *Metallomics* **9**, 1576-1584, doi:10.1039/c7mt00204a (2017).
- 927 42 Cook, P. F., Neville, M. E., Jr., Vrana, K. E., Hartl, F. T. & Roskoski, R., Jr. Adenosine  
928 cyclic 3',5'-monophosphate dependent protein kinase: kinetic mechanism for the bovine  
929 skeletal muscle catalytic subunit. *Biochemistry* **21**, 5794-5799, doi:10.1021/bi00266a011  
930 (1982).
- 931 43 Marullo, S. & Bouvier, M. Resonance energy transfer approaches in molecular  
932 pharmacology and beyond. *Trends Pharmacol Sci* **28**, 362-365,  
933 doi:10.1016/j.tips.2007.06.007 (2007).
- 934 44 Machleidt, T. *et al.* NanoBRET--A Novel BRET Platform for the Analysis of Protein-  
935 Protein Interactions. *ACS Chem Biol* **10**, 1797-1804, doi:10.1021/acscchembio.5b00143  
936 (2015).
- 937 45 Shaywitz, A. J. & Greenberg, M. E. CREB: a stimulus-induced transcription factor  
938 activated by a diverse array of extracellular signals. *Annu Rev Biochem* **68**, 821-861,  
939 doi:10.1146/annurev.biochem.68.1.821 (1999).
- 940 46 Knape, M. J. *et al.* Divalent Metal Ions Mg(2)(+) and Ca(2)(+) Have Distinct Effects on  
941 Protein Kinase A Activity and Regulation. *ACS Chem Biol* **10**, 2303-2315,  
942 doi:10.1021/acscchembio.5b00271 (2015).
- 943 47 Mick, D. U. *et al.* Proteomics of Primary Cilia by Proximity Labeling. *Dev Cell* **35**, 497-  
944 512, doi:10.1016/j.devcel.2015.10.015 (2015).
- 945 48 Desai, P. B., Stuck, M. W., Lv, B. & Pazour, G. J. Ubiquitin links smoothed to  
946 intraflagellar transport to regulate Hedgehog signaling. *J Cell Biol* **219**,  
947 doi:10.1083/jcb.201912104 (2020).
- 948 49 Pal, K. *et al.* Smoothed determines beta-arrestin-mediated removal of the G protein-  
949 coupled receptor Gpr161 from the primary cilium. *J Cell Biol* **212**, 861-875,  
950 doi:10.1083/jcb.201506132 (2016).
- 951 50 Varjosalo, M., Li, S. P. & Taipale, J. Divergence of hedgehog signal transduction  
952 mechanism between Drosophila and mammals. *Dev Cell* **10**, 177-186,  
953 doi:10.1016/j.devcel.2005.12.014 (2006).
- 954 51 Myers, B. R., Neahring, L., Zhang, Y., Roberts, K. J. & Beachy, P. A. Rapid, direct  
955 activity assays for Smoothed reveal Hedgehog pathway regulation by membrane  
956 cholesterol and extracellular sodium. *Proc Natl Acad Sci U S A* **114**, E11141-E11150,  
957 doi:10.1073/pnas.1717891115 (2017).
- 958 52 Tuson, M., He, M. & Anderson, K. V. Protein kinase A acts at the basal body of the  
959 primary cilium to prevent Gli2 activation and ventralization of the mouse neural tube.  
960 *Development* **138**, 4921-4930, doi:10.1242/dev.070805 (2011).
- 961 53 Lipinski, R. J., Bijlsma, M. F., Gipp, J. J., Podhaizer, D. J. & Bushman, W. Establishment  
962 and characterization of immortalized Gli-null mouse embryonic fibroblast cell lines. *BMC*  
963 *Cell Biol* **9**, 49, doi:10.1186/1471-2121-9-49 (2008).
- 964 54 Chen, W. *et al.* Activity-dependent internalization of smoothed mediated by beta-  
965 arrestin 2 and GRK2. *Science* **306**, 2257-2260, doi:10.1126/science.1104135 (2004).
- 966 55 Wolff, C., Roy, S. & Ingham, P. W. Multiple muscle cell identities induced by distinct  
967 levels and timing of hedgehog activity in the zebrafish embryo. *Curr Biol* **13**, 1169-1181,  
968 doi:10.1016/s0960-9822(03)00461-5 (2003).

- 969 56 Zhao, Z. *et al.* An essential role for Grk2 in Hedgehog signalling downstream of  
970 Smoothed. *EMBO Rep* **17**, 739-752, doi:10.15252/embr.201541532 (2016).
- 971 57 Taipale, J. *et al.* Effects of oncogenic mutations in Smoothed and Patched can be  
972 reversed by cyclopamine. *Nature* **406**, 1005-1009, doi:10.1038/35023008 (2000).
- 973 58 Rohatgi, R., Milenkovic, L., Corcoran, R. B. & Scott, M. P. Hedgehog signal transduction  
974 by Smoothed: pharmacologic evidence for a 2-step activation process. *Proc Natl Acad  
975 Sci U S A* **106**, 3196-3201, doi:10.1073/pnas.0813373106 (2009).
- 976 59 Corbit, K. C. *et al.* Vertebrate Smoothed functions at the primary cilium. *Nature* **437**,  
977 1018-1021, doi:10.1038/nature04117 (2005).
- 978 60 Rohatgi, R., Milenkovic, L. & Scott, M. P. Patched1 regulates hedgehog signaling at the  
979 primary cilium. *Science* **317**, 372-376, doi:10.1126/science.1139740 (2007).
- 980 61 Kim, J., Kato, M. & Beachy, P. A. Gli2 trafficking links Hedgehog-dependent activation of  
981 Smoothed in the primary cilium to transcriptional activation in the nucleus. *Proc Natl  
982 Acad Sci U S A* **106**, 21666-21671, doi:10.1073/pnas.0912180106 (2009).
- 983 62 Yogurtcu, O. N. & Johnson, M. E. Cytosolic proteins can exploit membrane localization  
984 to trigger functional assembly. *PLoS Comput Biol* **14**, e1006031,  
985 doi:10.1371/journal.pcbi.1006031 (2018).
- 986 63 Riobo, N. A., Saucy, B., Dilizio, C. & Manning, D. R. Activation of heterotrimeric G  
987 proteins by Smoothed. *Proc Natl Acad Sci U S A* **103**, 12607-12612,  
988 doi:10.1073/pnas.0600880103 (2006).
- 989 64 Shen, F., Cheng, L., Douglas, A. E., Riobo, N. A. & Manning, D. R. Smoothed is a  
990 fully competent activator of the heterotrimeric G protein G(i). *Mol Pharmacol* **83**, 691-  
991 697, doi:10.1124/mol.112.082511 (2013).
- 992 65 Mukhopadhyay, S. *et al.* The ciliary G-protein-coupled receptor Gpr161 negatively  
993 regulates the Sonic hedgehog pathway via cAMP signaling. *Cell* **152**, 210-223,  
994 doi:10.1016/j.cell.2012.12.026 (2013).
- 995 66 Hwang, S. H. *et al.* The G protein-coupled receptor Gpr161 regulates forelimb formation,  
996 limb patterning and skeletal morphogenesis in a primary cilium-dependent manner.  
997 *Development* **145**, doi:10.1242/dev.154054 (2018).
- 998 67 Shimada, I. S. *et al.* Basal Suppression of the Sonic Hedgehog Pathway by the G-  
999 Protein-Coupled Receptor Gpr161 Restricts Medulloblastoma Pathogenesis. *Cell Rep*  
1000 **22**, 1169-1184, doi:10.1016/j.celrep.2018.01.018 (2018).
- 1001 68 Regard, J. B. *et al.* Activation of Hedgehog signaling by loss of GNAS causes  
1002 heterotopic ossification. *Nat Med* **19**, 1505-1512, doi:10.1038/nm.3314 (2013).
- 1003 69 Moore, B. S. *et al.* Cilia have high cAMP levels that are inhibited by Sonic Hedgehog-  
1004 regulated calcium dynamics. *Proc Natl Acad Sci U S A* **113**, 13069-13074,  
1005 doi:10.1073/pnas.1602393113 (2016).
- 1006 70 Low, W. C. *et al.* The decoupling of Smoothed from Galphai proteins has little effect  
1007 on Gli3 protein processing and Hedgehog-regulated chick neural tube patterning. *Dev  
1008 Biol* **321**, 188-196, doi:10.1016/j.ydbio.2008.06.014 (2008).
- 1009 71 Tschaikner, P., Enzler, F., Torres-Quesada, O., Aanstad, P. & Stefan, E. Hedgehog and  
1010 Gpr161: Regulating cAMP Signaling in the Primary Cilium. *Cells* **9**,  
1011 doi:10.3390/cells9010118 (2020).
- 1012 72 Pusapati, G. V. *et al.* G protein-coupled receptors control the sensitivity of cells to the  
1013 morphogen Sonic Hedgehog. *Sci Signal* **11**, doi:10.1126/scisignal.aao5749 (2018).
- 1014 73 Meloni, A. R. *et al.* Smoothed signal transduction is promoted by G protein-coupled  
1015 receptor kinase 2. *Mol Cell Biol* **26**, 7550-7560, doi:10.1128/MCB.00546-06 (2006).
- 1016 74 MacDonald, B. T., Tamai, K. & He, X. Wnt/beta-catenin signaling: components,  
1017 mechanisms, and diseases. *Dev Cell* **17**, 9-26, doi:10.1016/j.devcel.2009.06.016 (2009).
- 1018 75 Metcalfe, C. & Bienz, M. Inhibition of GSK3 by Wnt signalling--two contrasting models. *J  
1019 Cell Sci* **124**, 3537-3544, doi:10.1242/jcs.091991 (2011).



- 1020 76 Nusse, R. & Clevers, H. Wnt/beta-Catenin Signaling, Disease, and Emerging  
1021 Therapeutic Modalities. *Cell* **169**, 985-999, doi:10.1016/j.cell.2017.05.016 (2017).
- 1022 77 Steinhart, Z. & Angers, S. Wnt signaling in development and tissue homeostasis.  
1023 *Development* **145**, doi:10.1242/dev.146589 (2018).
- 1024 78 Piao, S. *et al.* Direct inhibition of GSK3beta by the phosphorylated cytoplasmic domain  
1025 of LRP6 in Wnt/beta-catenin signaling. *PLoS One* **3**, e4046,  
1026 doi:10.1371/journal.pone.0004046 (2008).
- 1027 79 Cselenyi, C. S. *et al.* LRP6 transduces a canonical Wnt signal independently of Axin  
1028 degradation by inhibiting GSK3's phosphorylation of beta-catenin. *Proc Natl Acad Sci U*  
1029 *S A* **105**, 8032-8037, doi:10.1073/pnas.0803025105 (2008).
- 1030 80 Wu, G., Huang, H., Garcia Abreu, J. & He, X. Inhibition of GSK3 phosphorylation of  
1031 beta-catenin via phosphorylated PPPSPXS motifs of Wnt coreceptor LRP6. *PLoS One*  
1032 **4**, e4926, doi:10.1371/journal.pone.0004926 (2009).
- 1033 81 Stamos, J. L., Chu, M. L., Enos, M. D., Shah, N. & Weis, W. I. Structural basis of GSK-3  
1034 inhibition by N-terminal phosphorylation and by the Wnt receptor LRP6. *Elife* **3**, e01998,  
1035 doi:10.7554/eLife.01998 (2014).
- 1036 82 Ocbina, P. J., Tuson, M. & Anderson, K. V. Primary cilia are not required for normal  
1037 canonical Wnt signaling in the mouse embryo. *PLoS One* **4**, e6839,  
1038 doi:10.1371/journal.pone.0006839 (2009).
- 1039 83 Hauser, A. S., Attwood, M. M., Rask-Andersen, M., Schioth, H. B. & Gloriam, D. E.  
1040 Trends in GPCR drug discovery: new agents, targets and indications. *Nat Rev Drug*  
1041 *Discov* **16**, 829-842, doi:10.1038/nrd.2017.178 (2017).
- 1042 84 Oprea, T. I. *et al.* Unexplored therapeutic opportunities in the human genome. *Nat Rev*  
1043 *Drug Discov* **17**, 317-332, doi:10.1038/nrd.2018.14 (2018).
- 1044 85 Zimmermann, B., Schweinsberg, S., Drewianka, S. & Herberg, F. W. Effect of metal ions  
1045 on high-affinity binding of pseudosubstrate inhibitors to PKA. *Biochem J* **413**, 93-101,  
1046 doi:10.1042/BJ20071665 (2008).
- 1047 86 Myers, B. R. *et al.* Hedgehog pathway modulation by multiple lipid binding sites on the  
1048 smoothed effector of signal response. *Dev Cell* **26**, 346-357,  
1049 doi:10.1016/j.devcel.2013.07.015 (2013).
- 1050 87 Lu, T. W. *et al.* Two PKA RIalpha holoenzyme states define ATP as an isoform-specific  
1051 orthosteric inhibitor that competes with the allosteric activator, cAMP. *Proc Natl Acad Sci*  
1052 *U S A* **116**, 16347-16356, doi:10.1073/pnas.1906036116 (2019).
- 1053 88 Olsen, S. R. & Uhler, M. D. Affinity purification of the C alpha and C beta isoforms of the  
1054 catalytic subunit of cAMP-dependent protein kinase. *J Biol Chem* **264**, 18662-18666  
1055 (1989).
- 1056 89 Walker, C. *et al.* Cushing's syndrome driver mutation disrupts protein kinase A allosteric  
1057 network, altering both regulation and substrate specificity. *Sci Adv* **5**, eaaw9298,  
1058 doi:10.1126/sciadv.aaw9298 (2019).
- 1059 90 Olivieri, C. *et al.* Defective internal allosteric network imparts dysfunctional  
1060 ATP/substrate-binding cooperativity in oncogenic chimera of protein kinase A. *Commun*  
1061 *Biol* **4**, 321, doi:10.1038/s42003-021-01819-6 (2021).
- 1062 91 Walsh, D. A. & Ashby, C. D. Protein kinases: aspects of their regulation and diversity.  
1063 *Recent Prog Horm Res* **29**, 329-359, doi:10.1016/b978-0-12-571129-6.50012-9 (1973).
- 1064 92 Delaglio, F. *et al.* NMRPipe: a multidimensional spectral processing system based on  
1065 UNIX pipes. *J Biomol NMR* **6**, 277-293, doi:10.1007/BF00197809 (1995).
- 1066 93 Lee, W., Tonelli, M. & Markley, J. L. NMRFAM-SPARKY: enhanced software for  
1067 biomolecular NMR spectroscopy. *Bioinformatics* **31**, 1325-1327,  
1068 doi:10.1093/bioinformatics/btu830 (2015).
- 1069 94 Williamson, M. P. Using chemical shift perturbation to characterise ligand binding. *Prog*  
1070 *Nucl Magn Reson Spectrosc* **73**, 1-16, doi:10.1016/j.pnmrs.2013.02.001 (2013).

1071 95 Hansen, J. N., Rassmann, S., Stuken, B., Jurisch-Yaksi, N. & Wachten, D. CiliaQ: a  
1072 simple, open-source software for automated quantification of ciliary morphology and  
1073 fluorescence in 2D, 3D, and 4D images. *Eur Phys J E Soft Matter* **44**, 18,  
1074 doi:10.1140/epje/s10189-021-00031-y (2021).  
1075 96 Eccles, R. L. *et al.* Bimodal antagonism of PKA signalling by ARHGAP36. *Nat Commun*  
1076 **7**, 12963, doi:10.1038/ncomms12963 (2016).  
1077 97 Han, P., Sonati, P., Rubin, C. & Michaeli, T. PDE7A1, a cAMP-specific  
1078 phosphodiesterase, inhibits cAMP-dependent protein kinase by a direct interaction with  
1079 C. *J Biol Chem* **281**, 15050-15057, doi:10.1074/jbc.M601333200 (2006).  
1080 98 van Eeden, F. J. *et al.* Mutations affecting somite formation and patterning in the  
1081 zebrafish, *Danio rerio*. *Development* **123**, 153-164 (1996).  
1082 99 Stickney, H. L., Barresi, M. J. & Devoto, S. H. Somite development in zebrafish. *Dev Dyn*  
1083 **219**, 287-303, doi:10.1002/1097-0177(2000)9999:9999<::AID-DVDY1065>3.0.CO;2-A  
1084 (2000).  
1085 100 Chen, W., Burgess, S. & Hopkins, N. Analysis of the zebrafish smoothed mutant  
1086 reveals conserved and divergent functions of hedgehog activity. *Development* **128**,  
1087 2385-2396 (2001).  
1088
